# 1 **Maize residues changes soil fungal composition and decrease soil** 2 **microbial co-occurrence networks complexity.**

3

4 José F. Cobo-Díaz<sup>1</sup>, Fabienne Legrand<sup>1,2</sup>, Gaétan Le Floch<sup>1</sup> & Adeline Picot<sup>1</sup>

5 <sup>1</sup>Université de Brest, EA 3882, Laboratoire Universitaire de Biodiversité et d'Ecologie  
6 Microbienne, IBSAM, ESIAB, Plouzané, France.

7 <sup>2</sup>Lallemand SAS, 4 route de Beaupuy, 31180 Castelmaurou, France.

8

9 **Corresponding author:** José F. Cobo-Díaz (josecobo1983@gmail.com)

10 José F. Cobo-Díaz [0000-0002-0898-2358](https://orcid.org/0000-0002-0898-2358)

11 Gaétan Le Floch [0000-0001-7413-8852](https://orcid.org/0000-0001-7413-8852)

12 Adeline Picot [0000-0001-9740-560X](https://orcid.org/0000-0001-9740-560X)

13

## 14 **ABSTRACT.**

15 *Fusarium graminearum* (*Fg*) can cause different diseases in cereals and maize crops worldwide, and a  
16 correct management of previous crop residues could decrease disease incidence and/or severity.  
17 Bacterial, fungal and *Fusarium* communities were studied by metabarcoding approach in 8 agricultural  
18 fields with wheat-maize rotation system in Brittany, France, during three years. Additionally, shift in  
19 microbial communities were evaluated under mesocosm experiments in soils amended or not with  
20 maize residues and/or *Fg* isolate. Bacterial communities composition were highly influenced by crop  
21 soil origin in both environmental and mesocosm soils, while bacteria co-occurrence network

22 complexity was decreased by maize residues in environmental samples and *Fg* treatment in mesocosm  
23 samples. Maize residues altered slightly bacteria-fungi co-occurrence networks, while all treatments on  
24 mesocosm experiments showed lower complexity in bacteria-fungi networks than Control Soil  
25 treatment. A clear input of fungal genera *Epicoccum*, *Fusarium*, *Vishniacozyma*, *Articulospora*,  
26 *Papiliotrema*, *Sarocladium*, *Xenobotryosphaeria*, *Ramularia*, *Cladosporium*, *Cryptococcus* and *Bullera*  
27 from maize residues to soil were observed for both environmental and mesocosm samples. Moreover,  
28 an increase of *F. graminearum* and *F. avenaceum* was observed in soils where maize residues were  
29 presented. Finally, microbial co-occurrence networks reported some OTUs significantly correlated to  
30 *Fusarium* spp. OTUs, such as those assigned to *Epicoccum*, *Vishniacozyma* and *Sarocladium* fungal  
31 genera, previously reported as efficient biocontrol agents versus *Fusarium* spp. Moreover, a decrease of  
32 complexity was observed for soil bacterial and bacterial-fungal networks due to maize addition in both  
33 environmental and mesocosm communities.

34

35 **Keywords:** microbial communities, maize residues, crop soils, *Fusarium* species, co-occurrence  
36 networks

37

38

## 39 INTRODUCTION.

40 *Fusarium* Head Blight (FHB) is a devastating fungal disease of small-grain cereals, including wheat,  
41 caused mainly by members of *Fusarium* complexes (Bateman *et al.* 2007; Dean *et al.* 2012). Beyond  
42 significantly reduced yields, the main consequence is grain contamination with mycotoxins, including  
43 type A and B trichothecenes, produced by toxigenic *Fusarium* spp. (Smith *et al.* 2016; Tralamazza *et*  
44 *al.* 2016). Among *Fusarium* spp. responsible for FHB, *F. graminearum* (Fg) is considered the fourth  
45 most economically-important plant fungal pathogen (Dean *et al.* 2012), and is within the most frequent  
46 species associated to FHB in Europe, besides *F. culmorum*, *F. avenaceum* and *F. poae* (Xu *et al.* 2005;  
47 Hellin *et al.* 2016). Moreover, a shift from *F. culmorum* to *F. graminearum* as the main *Fusarium*  
48 species has been recently observed in European cereal crops (Nielsen *et al.* 2011; Scauflaire *et al.*  
49 2011). Climatic change is the principal hypothesis put forward, although the increase in maize-wheat  
50 rotation crops may also contribute to this increase in *F. graminearum* at the expense of *F. culmorum*  
51 (Nielsen *et al.*, 2011). FHB control represents a major scientific challenge given the multiplicity of  
52 causal agents and the complex mechanisms leading to mycotoxin contamination.

53 The life cycle of *Fusarium* spp. and especially *F. graminearum* is relatively well known (Champeil *et*  
54 *al.*, 2004). *F. graminearum* is able to survive for several years saprophytically in soil and especially on  
55 crop residues which provide a carrier and nutrients necessary for its growth (Leplat *et al.*, 2013). Based  
56 on mesocosm experiments, the latter authors demonstrated a higher Fg growth on soil amended with  
57 residues than on bare soil while, among crop residues, higher growth was found on soil amended with  
58 maize residues, which provided the best carrying capacity over wheat or rapeseed residues (Leplat *et*  
59 *al.*, 2016). Similar observations were obtained from field studies (Schaafsma *et al.*, 2005; Blandino *et*  
60 *al.*, 2010). Overall, the risk of FHB is recognized to be higher when crop residues are left on the soil  
61 surface and with direct sowing (Maiorano *et al.*, 2008). Therefore, residues, and soil after residue

62 decomposition, are considered as the primary source of inoculum responsible for FHB. In spite of this,  
63 the composition and diversity of *Fusarium* spp. in these components have received much less attention  
64 than in grains.

65 Although higher incidence of FHB events were found in maize-wheat cropping systems, especially  
66 under minimum tillage practices (Dill-Macky and Jones 2000; Schöneberg *et al.* 2016; Cromey *et al.*,  
67 2002; Edwards & Jennings, 2018; Vogelgsang *et al.* 2011), there is some evidences of *Fusarium* spp.  
68 survival reduction due to the effect of maize residues microbiota. For instance, Bateman *et al.* (2007)  
69 found that chopped maize tops appeared to suppress stem-base disease in wheats, while increasing the  
70 presence of *F. graminearum* in the crop, suggesting some microbial activity for disease suppression was  
71 occurring in maize residues. This was supported by previous finding of efficient BCAs, in both in vitro  
72 and greenhouse trials, isolated from maize tissues (Mousa *et al.* 2015), root rhizosphere (Abiala *et al.*  
73 2015) and residues (Luongo *et al.*, 2005; Singh *et al.*, 2009).

74 By colonizing previous crop residues and soil, *Fusarium* spp. can therefore interact with the microbiota  
75 associated with these components. Recent advances in next generation sequencing technologies (NGS)  
76 has allowed researchers to deepen our knowledge of bacterial and fungal communities in both soils  
77 (Chen *et al.* 2015; Zhao *et al.* 2016) and plants (Cobo-Díaz *et al.* 2019, Zhou *et al.* 2016). Beyond the  
78 description of compositions and diversities of microbial communities, metabarcoding data can also be  
79 applied to predict the functionality of microbial communities (Louca *et al.* 2016; Nguyen *et al.* 2016)  
80 and examine network interactions (Vacher *et al.* 2016). The accurate description of the field  
81 microbiota, using such state-of-the-art technologies in combination with co-occurrence networks, may  
82 thus contribute to better understand the mechanisms underlying *Fusarium* spp./microbiota interactions,  
83 which has never been undertaken so far. Such knowledge may thus provide chances to develop  
84 innovative biocontrol approaches against FHB, which performance have been disappointing so far.

85 Indeed, it is now agreed that the soil- or plant-associated microbiota serves as a protective barrier  
86 against pathogens. While residues may represent a carrier for pathogenic organisms, including  
87 *Fusarium* spp., the removal of previous crop residues could also deprive the soil from taxa with  
88 suppressive functionalities towards such pathogens. Some candidate antagonistic organisms against  
89 *Fusarium* spp. have been isolated from maize root rhizosphere (Abiala *et al.*, 2015), maize endophytes  
90 (Mosua *et al.*, 2015), maize residues (Luongo *et al.*, 2005; Singh *et al.*, 2009) and agricultural soils (He  
91 *et al.*, 2009). It was recently shown that the microbiota of maize residues were dominated by genera  
92 that contain strains previously reported as biocontrol agents, as well as plant pathogenic genera, such as  
93 *Fusarium*, *Acremonium*, *Phoma*, *Pseudomonas* and *Erwinia* (Cobo-Díaz *et al.*, 2019). Therefore, a  
94 better understanding of the maize residues effects on *Fusarium* spp/ microbiota interactions may help  
95 improve crop management practices under conservation tillage systems. This could either rely on  
96 inoculative biocontrol approaches on maize residues to reduce FHB incidence or severity in following  
97 crops.

98 In this context, the objectives of the present work were to: i) study the dynamics of *Fusarium* and  
99 microbial communities and their interactions in soil and maize residues on agricultural fields under  
100 wheat/maize rotation; ii) determine the influence of maize residues and *F. graminearum* inoculation on  
101 soil microbial communities mesocosm conditions; iii) identify putative taxa of interest significant  
102 correlated to *Fusarium* spp. in co-occurrence networks analysis.

103 To address these objectives, soil and maize residue samples were collected from 8 fields in Brittany,  
104 France at 2 time-points: in November 2016 just after maize harvest and again, five months later in  
105 April 2017. Metabarcoding sequencing of *16S rRNA* gene, internal transcribed spacer (ITS) and *EF1 $\alpha$*   
106 gene were then used to determine the bacterial, fungal and *Fusarium* communities on those samples. In  
107 addition, our microbial community profiles were also compared to an additional time-point in April

108 2015 which was included in a previous study from our laboratory (Legrand *et al.*, 2018). The influence  
109 of maize residues on soil microbial communities were confirmed under mesocosm conditions with soil  
110 samples inoculated or not with *Fg.*

111

## 112 MATERIALS AND METHODS

### 113 Soil and maize stalk sampling.

114 Soils were selected from an initial amount of 31 agronomics fields sampled on April 2015 in Brittany,  
115 France (28)(Legrand et al, 2019), and a total of 8 soils were sampled in 2 additional dates, in November  
116 2016 and April 2017. Fields localization and crop practices are described in Table 1. Fields were under  
117 maize/wheat rotation (in winter/spring rotation) for at least the last 4 years, except P16 and P23 that  
118 had no cultivation yet and onion, respectively, in sampling of April 2017. Wheat crop soils were taken  
119 one month before flowering and maize crop soils within 3 days after harvest. In each field, 15  
120 randomly points were selected, and the first 5 cm of soil (with a hand auger of 6 cm Ø); and, for  
121 November 2016 sampling, the above-ground part of one maize stalks with nodal region and leaves  
122 were randomly sampled in each point, at the same date of soil sampling. For soil P23, where not maize  
123 residues canopy was leave on soil, some maize residues were also taken from those not collected  
124 during harvest (Fig S1). Soil samples were stored at 4°C until were sieved with a 2 mm Ø mesh before  
125 DNA extraction, that was done within 24 h after sampling. Stalks were stored at 4°C until DNA  
126 extraction, made within 1 week.

### 127 Mesocosm experiment.

128 Soils and maize samples from fields P08, P09, P11, P16, P20 and P23 were employed on mesocosm  
129 experiment. Maize residues stems were cut in pieces of around 2 cm and then crushed in a blender  
130 machine, and 5 g of maize residues were added per 100 g of soil in “Maize” treatments. The maize  
131 residues added in each soil were those picked from the same field. A *F. graminearum* inoculum,  
132 prepared according to Legrand *et al.* (2018), was added to “*Fusarium*” treatments at a proportion of 2 g  
133 of maize infected kernel per 100 g of soil. A total of 4 treatments were tested for the 6 selected fields:

134 control soil (CS), control soil with maize residues (CM), soil with *F. graminearum* (FS) and soil with  
135 maize residues and *F. graminearum* (FM). The experiments were made within a month after sampling  
136 soils, using three replications (blocks of 4 x 4 x 6 cm) per treatment and soil, with a total of 72 blocks  
137 (4 treatments x 6 soils x 3 replicates) with 20 g of soil, or soil plus maize residues, per block. Pots  
138 were incubated in controlled conditions (day/night cycle: 16/8h, 22/18°C and 80% relative humidity)  
139 and watered each two days with sterile distilled water.

140

#### 141 **DNA extraction.**

142 DNA was extracted from 200 mg of crushed maize stalks and leaves using FastDNA<sup>®</sup> SPIN kit (MP  
143 Biomedicals, Santa Ana, CA) following the manufacturer's instructions. For soil samples, DNA was  
144 extracted from 1 g of soil using NucleoSpin<sup>®</sup> Kit for Soil (Machery-Nagel, Dueren, De) according to  
145 the manufacturer's instructions. Quality and concentration of purified DNA were determined using a  
146 UV spectrophotometer (NanoDrop1000, Thermo Scientific, USA).

147 Aliquots from environmental and mesocosm DNA extracted samples were diluted in at least 10 ng/μl  
148 before sending to the sequencing company for metabarcoding approaches.

149

#### 150 **PCR amplification and sequencing.**

151 Soil DNA extracted at day 15 for the 4 treatments (and three replicates) in mesocosm experiment for  
152 soils P08, P09, P11, P16, P20 and P23 (72 mesocosm samples); 72 field soil samples and 24 maize  
153 samples were used for amplicon sequencing by Illumina Miseq PE300. PCR amplification, Miseq  
154 libraries preparation and sequencing was performed at the McGill University and Génome Québec



155 Innovation Centre, Montréal, Canada. Primers 341F (5'-CCTACGGGNGGCWGCAG-3') and 805R  
156 (5'-GACTACHVGGGTATCTAATCC-3') (Herlemann *et al.*, 2011) were used to amplify the variable  
157 regions V3 and V4 of 16S rRNA gene; primers ITS1F (5'-CTTGGTCATTTAGAGGAAGTAA-3')  
158 and ITS4 (5'-TCCTCCGCTTATTGATATGC-3') (White *et al.*, 1990) to amplify the internal  
159 transcribed spacer; and primers Fa\_150 (5'-CCGGTCACTTGATCTACCAG-3') and Ra-2 (5'-  
160 ATGACGGTGACATAGTAGCG-3') (Cobo-Díaz *et al.*, 2019) to amplify the tubulin elongation factor  
161 (*ef1 $\alpha$* ) gene of *Fusarium* species.

162

### 163 **Read filtering.**

164 Sequencing data were processed using QIIME (Quantitative Insights Into Microbial Ecology, version  
165 1.9.1) (Caporaso *et al.*, 2010). For 16S rDNA V3-V4 amplicons, the forward (R1) and reverse (R2)  
166 paired-end sequences were joined using *multiple\_join\_paired\_ends.py*, followed by  
167 *multiple\_split\_libraries\_fastq.py* for demultiplexing. Chimera sequences were removed using  
168 UCHIME algorithm (Edgar *et al.*, 2011) implemented in *vsearch* v1.1.3  
169 (<https://github.com/torognes/vsearch>) against the ChimeraSlayer database (Haas *et al.*, 2011). Pick  
170 open strategy was used to cluster the sequences into Operational Taxonomic Units (OTUs) at 97%  
171 similarity cut-off using *pick\_open\_reference\_otus.py*. The taxonomic assignment was performed using  
172 UCLUST algorithm (Edgar, 2010) against GreenGenes v13\_8 database preclustered at 97% similarity  
173 cutoff (McDonald *et al.*, 2012). Chloroplast, mitochondria and “No assigned” OTUs were discarded for  
174 further analysis.

175 The R1 and R2 paired-end sequencing reads of ITS amplicons were processed independently using  
176 *multiple\_split\_libraries\_fastq.py*. ITS1 and ITS2 regions were first extracted separately from forward

177 and reverse fasta files respectively, using ITSx v1.0.11 (Bengtsson-Palme *et al.*, 2013) before being  
178 concatenated in a new file. A chimera filtering was made on concatenated file using the UCHIME  
179 algorithm (Edgar *et al.*, 2011) with VSEARCH v1.1.3 (<https://github.com/torognes/vsearch>) and a  
180 modified version of the UNITE/INSDC representative/reference sequences version 7.2 (UNITE  
181 Community 2017) as reference database. The modification consisted in extracting ITS1 and ITS2  
182 regions by ITSx software and concatenated them in the modified version of the database. The ITS1-  
183 ITS2 concatenated file of non-chimeric sequences was used for OTU picking running the QIIME script  
184 *pick\_open\_reference\_otus.py*, with BLAST (Altschul *et al.*, 1990) as taxonomic assignment method  
185 and a modified version of UNITE plus INSD non-redundant ITS database version 7.1 (Kõljalg *et al*  
186 2013). Again, the modified version consisted in concatenating ITS1 and ITS2 regions after extracting  
187 them using ITSx software. Those OTUs assigned to genus *Didymella* were checked manually, by  
188 BLAST on the web service (<https://blast.ncbi.nlm.nih.gov/Blast.cgi>) versus nt database to improve the  
189 taxonomic assignation, and in some cases were reassigned to genus *Epicoccum*, which was not  
190 presented in the last versions of UNITE database. Only OTUs assigned to kingdom Fungi were used  
191 for further analysis. The taxonomy for fungi known to have both sexual and asexual stages was  
192 replaced by accepted names according to Chen *et al.* (2018).

193 The library DADA2 (Callahan *et al.*, 2016) was used in R version 3.5.0 (r Development Core Team,  
194 2017) for *eflα* sequences filtering. Forward and reverse read pairs were trimmed and filtered, with  
195 forward reads truncated at 270 nt and reverse reads at 210 nt, no ambiguous bases allowed, and each  
196 read required to have less than two expected errors based on their quality scores. Amplicon Sequence  
197 Variants (ASVs) were independently inferred from the forward and reverse of each sample using the  
198 run-specific error rates, and then read pairs were merged requiring at least 15 bp overlap. The ASV

199 sequences were grouped in OTUs by *pick\_otus.py* QIIME script, using a 98% of similarity cutoff.  
200 OTUs representative sequences along with references were used for phylogenetic tree taxonomic  
201 assignation, according to Cobo-Díaz et al (2019).

## 202 **Statistical analysis.**

203 To minimize the inflation of rare OTUs in the community analysis, samples with less than 1,000  
204 sequences and taxa with less than 0.01 percent relative abundance across all samples were removed,  
205 using the corresponding options in Calypso web tool (Zakrzewski *et al.*, 2017). Total sum  
206 normalization and square root transformation (Hellinger transformation) were done for data  
207 normalization. Principal Coordinates analysis (PCoA) was computed with the normalized data using  
208 Bray-Curtis distance metric in Calypso web tool (Zakrzewski *et al.*, 2017) while adonis test were done  
209 by *vegan* R-package (Oksanen). Richness and evenness indexes were calculated with normalized data  
210 and a previous samples rarefaction to the number of reads for the smallest sample. Wilcoxon-rank test  
211 or ANOVA test were used to compare taxa relative abundance on normalized data, and Core  
212 Microbiome analysis were computed at genus level using 0.70 as core relation samples in group. All  
213 the statistical analysis listed were made in Calypso web tool (Zakrzewski *et al.*, 2017).

214 Metabolic and ecologically relevant functions were annotated by FAPROTAX (Louca *et al.* 2016) for  
215 the 16S rRNA gene OTU, and Wilcoxon-rank test were used to compare functions relative abundance  
216 on hellinger transformed data in Calypso web tool (Zakrzewski *et al.*, 2017).

## 217 **Network analysis.**

218 The 200 most abundant OTUs were extracted from both bacterial and fungal otu-tables, and  
219 joined before were uploaded in the Molecular Ecological Network analysis Pipeline (MENAP) (Deng  
220 *et al.* 2012) in order to construct the corresponding Molecular Ecological Network (MEN) using two

221 major steps. First, the pairwise similarity of OTU abundance across the samples was used to create a  
222 Pearson correlation matrix. Then, an adjacency matrix was determined by Random Matrix Theory  
223 (RMT)-based approach using a regressed Poisson distribution for the prediction of the nearest neighbor  
224 spacing distribution of eigenvalues.

225 Those nodes with the highest value of degree, betweenness, stress centrality and/or  
226 eigenvector centrality were extracted beside the nodes with a significant correlation value (edge) to plot  
227 the corresponding sub-network. Ruby homemade scripts were used to select the nodes and edges used  
228 for sub-network plots, and to add taxonomic information from OTU table to nodes files. Network  
229 graphs were plotted by Gephi 0.9.2 (Bastian *et al.* 2009) using Fruchterman Reingold spatialisation  
230 (Fruchterman *et al.* 1991). Nodes and network topological indices were calculated within the MENAP  
231 webtool (Deng *et al.* 2012).

### 232 **Accession numbers.**

233 Demultiplexed raw sequence data were deposited in the Sequence Read Archive  
234 (<http://www.ncbi.nlm.nih.gov/sra>) under BioProject accession number PRJNA497210, while 16S  
235 rRNA and ITS sequences from samples taken in 2015 were deposited under BioProject PRJNA429425,  
236 with Experiment numbers SRR6475734, SRR6475732, SRR6475727, SRR6475718, SRR6457721,  
237 SRR6475715, SRR6457742 and SRR6475744 for 16S rRNA; and SRR6457737, SRR6457735,  
238 SRR6457728, SRR6475742, SRR6457747, SRR6457739, SRR6475721 and SRR6457719 for ITS  
239 region.

## 240 **RESULTS.**

### 241 **Shift in soil microbial communities along rotation**

#### 242 *Fusarium communities*

243 A total of 2,914,818 *efl* $\alpha$  sequences were clustered into 31 OTUs (6 of them with abundance lower  
244 than 0.01 % of total *efl* $\alpha$  sequences) assigned to *Fusarium* or *Neocosmospora* species, after filtering  
245 raw reads from 24 maize residues samples and 72 soil samples. Replicates 5SP09A and 7SP06C were  
246 removed for further analysis due to a low number of sequences obtained. Maize samples showed  
247 significant ( $p < 0.05$ ) higher richness ( $6.3 \pm 2.1$  OTUs) than soil samples (from  $2.7 \pm 1.6$  to  $4.1 \pm 2.2$ ),  
248 while no significant differences were found for evenness (Fig. 1a,b).

249 The *Fusarium* spp. composition of maize samples was significantly different to that of soil samples  
250 (adonis test,  $R^2 = 0.29$ ,  $p$ -value = 0.001) and there was no significant differences between soil samples  
251 (adonis test,  $R^2 = 0.04$ ,  $p$ -value = 0.084), while parcels showed significant differences for soil samples  
252 (adonis test,  $R^2 = 0.32$ ,  $p$ -value = 0.001). PCoA of *Fusarium* OTUs illustrated such differentiation  
253 among soil samples (Fig. 1c).

254 *F. oxysporum* was the most abundant species in soil samples, with significant higher values (rank test,  
255  $p < 0.05$ ) than in maize samples while maize samples were significantly dominated by *F. graminearum*  
256 and *F. avenaceum*. In addition, *F. avenaceum* was significantly more abundant in soil samples from  
257 2016 than the other years (Fig. 1d). Other species with significant higher abundances in maize samples  
258 than in soil samples included *F. poae*, *F. temperatum* and *Fusarium* sp. FCCSC (*Fusarium citricola*  
259 species complex), and to a lesser extent, *F. venenatum*, *F. sporotrichioides* and *F. proliferatum* (Fig.  
260 1d).

261

#### 262 *Bacterial communities*

263 A total of 2,030,793 sequences of *16S rRNA* gene were clustered into 1,753 OTUs after removing rare  
264 OTUs (relative abundance < 0.01%) from 24 maize residue and 72 soil samples. Maize samples had  
265 significant (ANOVA, p-value < 0.001) lower richness ( $385 \pm 201$  OTUs) than soil samples (from  $1090$   
266  $\pm 57$  to  $1444 \pm 88$  OTUs) while no significant differences were observed depending on year in soil  
267 samples (Fig. 2a). Similar pattern was observed for evenness, with significant (ANOVA, p-value <  
268 0.001) lower levels in maize samples ( $0.75 \pm 0.05$ ) than in soil samples (from  $0.88 \pm 0.03$  to  $0.91 \pm$   
269  $0.01$ ) (Fig. 2b).

270 Soil samples were mainly grouped by field (adonis test,  $R^2 = 0.38$ , p-value = 0.001) in PCoA analysis,  
271 and were significant differentiated from maize samples (adonis test,  $R^2 = 0.52$ , p-value = 0.001) (Fig.  
272 2c).

273 The *Sphingomonas*, *Pseudomonas*, *Flavobacterium*, *Pedobacter*, and *Janthinobacterium* genera were  
274 significantly more abundant (rank test,  $p < 0.05$ ) in maize samples than in soil samples (Fig. 2d), but no  
275 increase of these genera was found on soil samples from 2016 compared to other years. The  
276 *Kaistobacter*, *Rhodoplanes*, *Nitrospira* and *DA101* genera were significantly more abundant in soil  
277 samples than in maize samples (rank test,  $p < 0.05$ ) (Fig. 2d).

278 At functional level, estimated by FAPROTAX, there were significant differences between maize and  
279 soil samples (adonis test,  $R^2 = 0.76$ ,  $p = 0.001$ ) and also within soil samples (adonis test,  $R^2 = 0.18$ ,  
280  $p = 0.001$ ) (Fig. 3a). Some functional groups were highly represented in maize samples, including those  
281 related to chemoheterotrophy, plant pathogen and fermentation; while soil samples were enriched in  
282 functions related to nitrogen cycle and phototrophy, among others (Fig. 3b). Similar pattern was  
283 observed when comparing soil samples from 2016 to the 2 other years, which had significant higher  
284 values for chemoheterotrophy and plant pathogen in 2016, and lower values for functions related to  
285 nitrogen cycle and phototrophy (Fig. 3b).

286

### 287 ***Fungal communities***

288 A total of 2,121,490 sequences of ITS were clustered into 440 OTUs after removing rare OTUs  
289 (relative abundance < 0.01%) from 24 maize residues and 72 soil samples. There was a significant  
290 increase in soil richness throughout years, with values of  $69 \pm 29$ ,  $113 \pm 22$  and  $179 \pm 16$  OTUs for  
291 2015, 2016 and 2017, respectively, while maize had lower richness ( $88 \pm 15$  OTUs) than soil from  
292 2016 (Fig. 4a). Evenness values were also significantly lower in maize samples ( $0.40 \pm 0.18$ ) compared  
293 to soil samples (from  $0.65 \pm 0.08$  to  $0.72 \pm 0.06$ ) (Fig. 4b).

294 There was a significant effect of field (adonis test,  $R^2 = 0.38$ , p-value = 0.001) and year (adonis test,  $R^2$   
295 = 0.20 p-value = 0.001) in the composition of soil fungal communities, while soil samples were  
296 significantly differentiate from maize residues samples (adonis test,  $R^2 = 0.41$ , p-value = 0.001) (Fig.  
297 4c). PCoA, at OTU level, showed that soil samples from 2016 were clustered away from the other 2  
298 years, except for field P23 (Fig. 4c). Interestingly, this field had no maize residues left on the surface  
299 during 2016 harvest.

300 The *Epicoccum*, *Fusarium*, *Vishniacozyma*, *Articulospora*, *Papiliotrema*, *Sarocladium*,  
301 *Xenobotryosphaeria*, *Ramularia*, *Cladosporium*, *Cryptococcus* and *Bullera* genera were significantly  
302 more abundant (rank test,  $p < 0.05$ ) in maize samples than in soil samples, and, except for *Articulospora*,  
303 they were also significantly more abundant (rank test,  $p < 0.05$ ) in soil samples from 2016 than the other  
304 two years (Fig. 4d). Soil samples were dominated by *Saitozyma*, *Acremonium*, *Humicola*, *Fusicolla*,  
305 *Schizothecium*, *Chrysosporium* and *Exophiala* genera, with significant higher abundance in soil  
306 samples than in maize samples (Fig. 4d).

307

### 308 **Molecular Ecological Network analysis in field samples**

309 Four correlation-based networks of bacterial OTUs were constructed by soil sample per year and maize  
310 residue sample. Co-occurrence network of soils from 2016 (soil\_2016) showed lower connectivity (less  
311 links, average degree and connectedness) than other networks (Table 2). The lowest value for  
312 centralization of degree found in soil\_2016 indicates more similarity in connectivity values within the  
313 nodes of this network, compared to others. Similar observation was found for centralization of stress  
314 centrality, which was lower in soil\_2015 and soil\_2016, meaning that similar values of stress centrality  
315 for the nodes within this networks (Table 2). This differences were clearly observed in the sub-network  
316 constructed with the nodes with highest value for each topological indexes (degree, stress centrality,  
317 betweenness and eigenvector centrality) and the linked nodes, where a higher proportion of nodes  
318 belonging to phylum *Gemmatimonadetes* was found for maize network, and *Actinobacteria* and  
319 *Acidobacteria* for soil networks (Fig. S2). Moreover, nodes in soil\_2016 network presented a decrease  
320 in degree value (number of correlations), while some nodes presented higher eigenvalue centrality  
321 values compared to other networks (Fig. 5a). Similar observations were found for bacteria-fungi  
322 networks, with soil\_2016 as the network whose nodes presented lower degree values, followed by  
323 maize\_2016 and soil\_2015 (Fig. 5c). This nodes with highest eigenvalue centrality were mainly  
324 *Actinobacteria* belong to *Gailellaceae* family, and no fungal node was found between them (Table S1).  
325 Some OTUs negatively correlated with nodes of *Fusarium* spp. were found, including 2 nodes in  
326 soil\_2016 network (both belonging to Gammaproteobacteria), 4 nodes in soil\_2017 network (belonging  
327 to Acidobacteria and Ascomycota) and 4 nodes in maize network (including one belonging to  
328 Bacteroidetes, two to Ascomycota and one to Gammaproteobacteria) (Table 3). Moreover, up to 7  
329 nodes were positively correlated to *Fusarium* nodes in the maize network, among which 3 belonged to  
330 *Flavobacterium*, two to *Vishniacozyma*, one to *Sarocladium* and the other to class Sordariomycetes  
331 (Table 3).



332

333 **Influence of maize residues and *F. graminearum* inoculation in soil microbial communities under**  
334 **mesocosm conditions.**

335 ***Bacterial communities.***

336 A total of 1,689,356 sequences of *16S rRNA* gene were clustered into 1,822 OTUs after removing rare  
337 OTUs (relative abundance < 0.01%) from 72 mesocosm soil samples. Excluding samples from field  
338 P16, which presented lowest values for alpha diversity indices, *Fg* inoculation or amendment with  
339 maize residues induced higher richness than in control samples ( $1289 \pm 61$  OTUs in SC compared to  
340  $1367 \pm 54$  OTUs  $1341 \pm 55$  OTUs, in MC and SF respectively)(Fig. S3a). When comparing samples  
341 amended with maize residues, *Fg* inoculation induced significant lower evenness values, ( $0.85 \pm 0.06$   
342 versus  $0.90 \pm 0.01$ , in MF and MC, respectively)(Fig. S3b).

343 In terms of bacterial compositional structure, differences due to treatment (adonis test,  $R^2 = 0.09$ , p-  
344 value = 0.007) were much less than the variation between fields (adonis test,  $R^2 = 0.70$ , p-value =  
345 0.001), as was shown in PCoA plot (Fig. 6a).

346 The addition of maize residues induced a significant increase in *Sphingomonas*, *Opitutus*,  
347 *Chthoniobacter* and *Fimbriimonas* relative abundance and a decrease in *Methylibium*, *Nitrospira* and  
348 *Terracoccus* whether or not soils were inoculated with *Fg* (Fig. S3c,d). In non-inoculated soil, the  
349 addition of maize induced a significant higher levels of other genera such as *Cellvibrio*, *Devosia*,  
350 *Phenylobacterium*, *Luteolibacter*, *Caulobacter*, *Luteibacter* and *Prostheco bacter* and lower levels for  
351 *Kaistobacter*, *Pseudomonas* and *Nitrospira* genera (Fig. S3d). Whether or not soil were amended with  
352 maize residues, *Fg* inoculation induced an increase in relative abundance for *Sphingomonas*,  
353 *Burkholderia*, *Pseudomonas*, *Rhodanobacter*, *Cellvibrio*, *Opitutus* and *Rhizobium*, while *Kaistobacter*  
354 and *Rhodoplanes* were decreased (Fig. S3e).

355 At functional level, estimated by FAPROTAX, the addition of maize residues increased the relative  
356 abundance of OTUs assigned to nitrogen fixation, fermentation and cellulolysis, among other functions  
357 (Fig. S4a). Fg inoculation induced an increase in nitrogen fixation and plant pathogen functions, among  
358 others, and a decrease in others functions associated to nitrogen metabolism, such as nitrogen  
359 respiration in soil treatments (Fig. S4b) and nitrogen respiration, nitrate reduction and denitrification in  
360 maize residues treatments (Fig. S4c).

361

### 362 ***Fungal communities***

363 A total of 2,432,998 sequences of ITS were clustered into 264 OTUs after removing rare OTUs  
364 (relative abundance < 0.01%) from 72 mesocosm soil samples. Richness was significantly higher in  
365 MC treatment, with  $40 \pm 16$  OTUs in SF,  $144 \pm 27$  in SC,  $79 \pm 20$  in MF and  $136 \pm 21$  in MC (Fig.  
366 S5a). No significant differences were found for evenness values, which ranged from  $0.60 \pm 0.11$  to  $0.71$   
367  $\pm 0.06$  (Fig. S5b).

368 PCoA showed a significant clustering of samples by treatment (adonis test,  $R^2 = 0.62$ , p-value = 0.001),  
369 while slight differences were found by field (adonis test,  $R^2 = 0.12$ , p-value = 0.04) (Fig. 6b).

370 A significant decrease in *Fusarium* relative abundance was found in MF treatment compared to SF,  
371 with significant higher relative abundance of *Epicoccum*, *Podospora*, *Lasiosphaeris* and *Sarocladium*  
372 genera, among others (rank test,  $p < 0.05$ ), in MF compared to SF (Fig. S4c). In non-inoculated soils, the  
373 addition of maize (MC treatment) induced an increase in the *Podospora*, *Sarocladium*, *Ramularia*,  
374 *Cryptococcus*, *Phaeoacremonium* and *Apodus* genera (rank test,  $p < 0.05$ ) and a decrease in the  
375 *Acremonium*, *Fusicolla*, *Humicola* and *Ilyonectria* genera, among others, compared to SC treatment  
376 (Fig. S4d).

377

378 **Molecular Ecological Network analysis in mesocosm experiment.**

379 After removing samples for soil P16, which presented an important increase of *Rhodanobacter* genus  
380 for all the treatments (data not shown), co-occurrence network analysis were constructed for both  
381 bacterial and fungal data pooled together, and with bacterial data only. In bacteria networks, CM  
382 treatment showed the highest values for total links and average degree, with a progressive decrease for  
383 CS, FM and FS networks for both parameters (Table 4). Moreover, FS treatment presented the lowest  
384 values for average clustering coefficient, centralization of degree and density, while had the highest  
385 values for average path distance, harmonic geodesic distance, centralization betweenness and  
386 centralization of eigenvector centrality (Table 4). Lower values for the degree eigenvalue centrality  
387 proportion was observed in nodes from FS in bacteria networks (Fig. 5b) and in nodes from all  
388 treatments except CS for bacteria-fungi network (Fig. 5d). Nodes with highest eigenvalue centrality  
389 were mainly assigned to Kaistobacter genus and/or Proteobacteria phylum, and no fungal node was  
390 detected within them (Table S1).

391 Finally, fungi-fungi intra-kingdom and fungi-bacteria inter-kingdom connections were higher in  
392 mesocosm treatments, except for FS treatment for f-f connections, compared to environmental  
393 networks,. (Table 5). Moreover, presence of maize residues decrease the levels of the 3 kind of  
394 connections (bacteria-bacteria, fungi-fungi, and fungi-bacteria) for soil environmental and mesocosm  
395 networks, except for ff connection in mesocosm (Table 5).

396

397 **DISCUSSION.**

398 Basic but yet unanswered questions regarding the ecology of *Fusarium* spp. still remain. First,  
399 although soil and residues constitute the main FHB inoculum sources (Bateman *et al.* 2007; Fernandez  
400 *et al.* 2008), the knowledge on microbial ecology in residues and its influence on pathogen dispersion

401 or suppression is scarce. These findings could be important for the selection of appropriate control  
402 strategies in order to determine the predominant *Fusarium* spp. that should be targeted and the field  
403 components and wheat stages during which treatments are more likely to affect pathogen populations  
404 or their impact on the plant. In the present study, *F. graminearum*, *F. avenaceum*, *F. poae* and *F.*  
405 *temperatum* were the most abundant *Fusarium* species found on maize residues, as has already been  
406 reported on maize stalks after a 6-month field exposure (Köhl et al, 2015), maize residues collected  
407 after harvest (Cobo-Diaz *et al.* 2019, Dill-Macky and Jones 2000), maize stalks and kernels (Basler  
408 2016), wheat kernels (Xu *et al.* 2005; Karlsson *et al.* 2016, 2017; Nicolaisen *et al.* 2014) and barley  
409 kernels (Schöneberg *et al.* 2016). In contrast, *F. oxysporum* was found as the main species in soil  
410 samples, as has been found previously on wheat crops (Edel-Hermann et al, 2015; Silvestro *et al.*,  
411 2013; Leblanc et al, 2015). Moreover, an important input of *F. graminearum* and *F. avenaceum* from  
412 maize residues to soils was found, which confirmed maize residues as an important source of these  
413 *Fusarium* species associated to FHB. Furthermore, the low abundance of this species found in soils  
414 sampled before wheat flowering, after maize inter-crops and conventional tillage (except P11 field,  
415 which was under minimum tillage, and P23, with not maize residues canopy), support the idea of use  
416 conventional tillage approaches to reduce the availability of *Fusarium* spp. pathogens for following  
417 crops, as has been suggested before (Schöneberg *et al.* 2016).

418 Those fungal genera promoted by maize residues addition harbour maize or/and wheat pathogens  
419 species, such as *Cladosporium*, *Fusarium* and *Epicoccum*; and other plant pathogens, such as  
420 *Sarocladium* and *Ramularia*. Conversely, strains with antagonism effect against *F. graminearum* in  
421 wheat were found for *Epicoccum* (Luongo *et al.* 2005; Jensen *et al.*, 2016), *Cladosporium* (Luongo *et*  
422 *al.* 2005) and *Sarocladium* (Comby *et al.* 2017). Another genera deposited in soil from maize residues  
423 were *Vishniacozyma*, *Papiliotrema*, *Cryptococcus* and *Bullera*, which belong to order *Tremellales*.

424 Some strains of *Cryptococcus* were described as effective biocontrol agent (BCA) against *Fusarium*  
425 spp. in wheat (Wachowska *et al.* 2013b; Schisler *et al.* 2011) and those genera belong to *Tremellales*  
426 could be considered within this group of putative BCA against *Fusarium* spp. because they contain  
427 strains previously grouped within *Cryptococcus* genus (Liu *et al.* 2015). This field results were  
428 supported with the results obtained in mesocosm experiments, which reported also a increase in relative  
429 abundance due to maize residues of genera that harbor strains reported previously as BCA or organism  
430 associated to healthy soils in *Fusarium* spp. diseases studies, such as *Cryptococcus* (Wachowska *et al.*  
431 2013b; Schisler *et al.* 2011), *Articulospora* (Sugahara *et al.* 2018) and *Sarocladium* (Comby *et al.*  
432 2017). Furthermore, maize residues microbial co-occurrence networks presented some OTUs assigned  
433 to *Sarocladium*, *Epicoccum* and *Vishniacozyma* genera with significant correlation with OTUs  
434 assigned *Fusarium* spp. which could be an evidence of antagonism effect of this genera versus  
435 *Fusarium* spp. The same results, except for *Vishniacozyma*, were found for another maize residues  
436 sampling in Brittany, France (Cobo-Díaz *et al.* 2019), and their relative abundance increase in soils  
437 could have a antagonistic effect against *Fusarium* spp. *Flavobacterium*, *Sphingomonas*, *Pseudomonas*,  
438 *Pedobacter* and *Janthinobacterium* were found as the most abundant in our maize samples, as has been  
439 reported previously for maize residues (Cobo-Díaz *et al.* 2019), maize rhizospheric soils (Yang *et al.*  
440 2017a; García-Salamanca *et al.* 2013; Li *et al.* 2014; Correa-Galeote *et al.* 2016) or even in wheat  
441 rhizospheric soils (Yin *et al.* 2013). This bacterial genera were reported as bacterial genera associated  
442 with reduced colonization of *Fusarium* spp. in maize stalks (Köhl *et al.* 2015) and/or contains strains  
443 characterized as BCA against *Fusarium* spp. (Wachowska *et al.* 2013a,b; Ito *et al.* 2013; Chen *et al.*  
444 2018A; De Boer *et al.* 2007; Haack *et al.* 2016). The predominance in maize residues of such genera  
445 make them a potential source of bacterial species for plant pathogen control, but no increase of their  
446 relative abundance in the corresponding soil samples were observed. Maybe it could be due to the short

447 time lapsed between harvest and sampling, which was no more than 3 days. Furthermore, maize  
448 residues generate changes in the soil nitrogen transformations (Li *et al.* 2019) and increase soil nitrogen  
449 content (Maresma *et al.* 2018), and could generate the decrease, in relative abundance, of some  
450 bacterial functions related to nitrogen metabolism observed in our field samples.

451 Differences in the soil bacterial composition structure among years was lower than variation  
452 between fields, while fungal communities composition were significant different between soil samples  
453 from 2016 and the other 2 years, except for P23, whose samples from 2016 were within the 2015-2017  
454 group. This field was the only one not amended with maize residues, although the base of the stalks were  
455 leave on crop (see Fig. S1). This maize residues influence on fungal communities observed in PCoA  
456 analysis was highlighted with the increase of relative abundance in soils after maize harvest of many  
457 fungal genera that clearly comes from those residues left on the field, while not increase was found on  
458 bacterial genera due to maize residues. Moreover, mesocosm experiment results corroborated this  
459 important influence of maize residues (and also *Fg* inoculation) on fungal communities structure and  
460 composition, while not influence was found for bacteria.

461 This stronger influence in fungal than bacterial communities had been observed in soil  
462 transplant experiments along 6 years (Zhao *et al.*, 2019). Moreover, it have been found that microbial  
463 diversity or taxonomical information are not sensitive enough as indicator of ecosystem perturbations  
464 (Karimi *et al.* 2016) and in some cases significant changes in bacterial co-occurrence patterns were  
465 found while no differences were observed in diversity indexes (He *et al.* 2017). The use of ecological  
466 networks as indicators of environmental quality had reported that higher levels of perturbation  
467 correlated to lower complexity in microbial networks (Karimi *et al.* 2016, Lupatini *et al.* 2014,  
468 Zappelini *et al.* 2015, Sauvadet *et al.* 2016), including disease incidence as perturbation factor (Yang *et*  
469 *al.*, 2017b). In our study, although bacterial communities did not present strong differences due to

470 maize presence, or even along years of sampling, their co-occurrence networks presented a significant  
471 decrease of connectivity and nodes degree values when maize were added to soil samples. The main  
472 factor could be changes in interaction between species due to the increase of nutrients and also the  
473 differences in fungal communities composition observed by maize residues addition. Moreover, this  
474 changes on bacterial networks was accentuated with the increase of importance for nodes belonging to  
475 *Actinobacteria* phylum, which although were not abundant in the communities, had an important role  
476 within co-occurrence networks. Phylum *Actinobacteria* was found previously as a key taxon on  
477 bacterial soil networks, where it could reduce the chance of soil plant pathogen invasion for tobacco  
478 bacterial wilt disease (Yang *et al.* 2017b). The decrease of connectivity values has also been observed  
479 on soil bacterial communities due to land use, where higher density of links were found in natural  
480 forest soils than pasture or field and plantations soils (Lupatini *et al.* 2014), so that maize addition  
481 could be considered as a strong perturbation of soil microbial co-occurrence networks. Furthermore,  
482 the not clearly existence of keystone taxa (data not shown) could be advantageous to the ecosystem  
483 functionality, as the lost or decrease on any microbial taxa is not going to weaken the inter correlation  
484 network of the ecosystem (Toju *et al.* 2018).

485

## 486 **CONCLUSIONS**

487 Maize residues have a stronger influence in fungal communities than bacterial communities  
488 composition, although reduction on connectivity indexes for bacterial co-occurrence networks was  
489 found due to maize addition. Bacterial communities composition were conserved along the time, with a  
490 clear differentiation due to the field instead of time of sampling. Maize residues harbour both bacterial  
491 and fungal genera previously reported as biocontrol agents against *Fusarium* spp. or diseases caused by  
492 this genera, but only an increase in relative abundance of those genera belonged to fungi were observed

493 in both field and mesocosm soils amended with maize residues. Some OTUs belonged to those BCA  
494 genera, such as the bacteria *Flavobacterium* and the fungal *Epicoccum*, *Vishniacozyma* and  
495 *Sarocladium*, presented significant co-occurrence with *Fusarium* spp. OTUs, mainly in maize  
496 networks. Further experiments and studies has to be done to clarify their effect in *Fusarium* disease  
497 suppression in following crops, and to found which agricultural practices can increase the presence of  
498 those BCA genera in soil, and reduce of FHB events or severity.



499           **BIBLIOGRAPHY.**

- 500           1. Abiala MA, Odebode AC, Hsu SF *et al.* Phytobeneficial properties of bacteria isolated from the  
501           rhizosphere of maize in Southwestern Nigerian soils. Voordouw G (ed.). *Applied and*  
502           *Environmental Microbiology* 2015;**81**:4736–43.
- 503           2. Al-Ani RA, Adhab MA, Mahdi MH *et al.* *Rhizobium japonicum* as a biocontrol agent of  
504           soybean root rot disease caused by *Fusarium solani* and *Macrophomina phaseolina*. *Plant*  
505           *Protection Science* 2012;**48**(4):149–155.
- 506           3. Altschul SF, Gish W, Miller W *et al.* Basic Local Alignment Search Tool. *Journal of Molecular*  
507           *Biology* 1990;**215**:403–10.
- 508           4. Araújo FD da S, Araújo WL, Eberlin MN. Potential of *Burkholderia seminalis* TC3.4.2R3 as  
509           biocontrol agent against *Fusarium oxysporum* evaluated by mass spectrometry imaging.  
510           *Journal of The American Society for Mass Spectrometry* 2017;**28**:901–7.
- 511           5. Basler R. Diversity of *Fusarium* species isolated from UK forage maize and the population  
512           structure of *F. graminearum* from maize and wheat. *PeerJ* 2016;**4**:e2143.
- 513           6. Bastian M, Heymann S, Jacomy M. Gephi: an open source software for exploring and  
514           manipulating networks. *International AAAI Conference on Weblogs and Social Media*,  
515           2009;**8**:361-362.
- 516           7. Bateman GL, Gutteridge RJ, Gherbawy Y *et al.* Infection of stem bases and grains of winter  
517           wheat by *Fusarium culmorum* and *F. graminearum* and effects of tillage method and maize-  
518           stalk residues. *Plant Pathology* 2007;**56**:604–15.

- 519 8. Bengtsson-Palme J, Ryberg M, Hartmann M *et al.* Improved software detection and extraction  
520 of ITS1 and ITS2 from ribosomal ITS sequences of fungi and other eukaryotes for analysis of  
521 environmental sequencing data. Bunce M (ed.). *Methods in Ecology and Evolution* 2013;**4**:914–  
522 9.
- 523 9. Blandino M, Pilati A, Reyneri A *et al.* Effect of maize crop residue density on *Fusarium* head  
524 blight and on deoxynivalenol contamination of common wheat grains. *Cereal Research*  
525 *Communications* 2010;**38**:550–9.
- 526 10. Callahan BJ, McMurdie PJ, Rosen MJ *et al.* DADA2: High-resolution sample inference from  
527 Illumina amplicon data. *Nature Methods* 2016;**13**:581–3.
- 528 11. Calvo-Garrido C, Elmer PAG, Viñas I *et al.* Biological control of botrytis bunch rot in organic  
529 wine grapes with the yeast antagonist *Candida sake* CPA-1. *Plant Pathology* 2013;**62**:510–9.
- 530 12. Caporaso JG, Kuczynski J, Stombaugh J *et al.* QIIME allows analysis of high-throughput  
531 community sequencing data. *Nature Methods* 2010;**7**:335–6.
- 532 13. Champeil A, Doré T, Fourbet JF. *Fusarium* head blight: epidemiological origin of the effects of  
533 cultural practices on head blight attacks and the production of mycotoxins by *Fusarium* in  
534 wheat grains. *Plant Science* 2004;**166**:1389–415.
- 535 14. Chen L, Zhang J, Zhao B *et al.* Bacterial community structure in maize stubble-amended soils  
536 with different moisture levels estimated by bar-coded pyrosequencing. *Applied Soil Ecology*  
537 2015;**86**:62–70.
- 538 15. Chen Y, Wang J, Yang N *et al.* Wheat microbiome bacteria can reduce virulence of a plant  
539 pathogenic fungus by altering histone acetylation. *Nature Communications* 2018;**9**, DOI:  
540 10.1038/s41467-018-05683-7.
- 541 16.

- 542 17. Chen W, Hambleton S, Seifert KA *et al.* Assessing performance of spore samplers in  
543 monitoring aeromycobiota and fungal plant pathogen diversity in Canada. Löffler FE (ed.).  
544 *Applied and Environmental Microbiology* 2018;**84**(9):pii:e02601–17.
- 545 18. Cobo-Díaz JF, Baroncelli R, Le Floch G *et al.* Combined metabarcoding and co-occurrence  
546 network analysis to profile the bacterial, fungal and *Fusarium* communities and their  
547 interactions in maize stalks. *Frontiers in Microbiology* 2019;**10**:261.
- 548 19. Cobo-Díaz JF, Baroncelli R, Le Floch G *et al.* A novel metabarcoding approach to investigate  
549 *Fusarium* species composition in soil and plant samples. *FEMS Microbiology Ecology* 2019;  
550 **95**:fiz084.
- 551 20. Comby M, Gacoin M, Robineau M *et al.* Screening of wheat endophytes as biological control  
552 agents against *Fusarium* head blight using two different in vitro tests. *Microbiological Research*  
553 2017;**202**:11–20.
- 554 21. Correa-Galeote D, Bedmar EJ, Fernández-González AJ *et al.* Bacterial communities in the  
555 rhizosphere of amilaceous maize (*Zea mays* L.) as assessed by pyrosequencing. *Frontiers in*  
556 *Plant Science* 2016;**7**:1016.
- 557 22. Cromeý MG, Shorter SC, Lauren DR *et al.* Cultivar and crop management influences on  
558 *Fusarium* head blight and mycotoxins in spring wheat (*Triticum aestivum*) in New Zealand.  
559 *New Zealand Journal of Crop and Horticultural Science* 2002;**30**:235–47.

- 560 23. De Boer W, Wagenaar A-M, Klein Gunnewiek PJA *et al.* In vitro suppression of fungi caused  
561 by combinations of apparently non-antagonistic soil bacteria: Suppression of fungi by non-  
562 antagonistic soil bacteria. *FEMS Microbiology Ecology* 2007;**59**:177–85.
- 563 24. de Boer W, Hundscheid MPJ, Klein Gunnewiek PJA *et al.* Antifungal rhizosphere bacteria can  
564 increase as response to the presence of saprotrophic fungi. van Overbeek LS (ed.). *PLOS ONE*  
565 2015;**10**:e0137988.
- 566 25. Dean R, Van Kan JAL, Pretorius ZA *et al.* The Top 10 fungal pathogens in molecular plant  
567 pathology: Top 10 fungal pathogens. *Molecular Plant Pathology* 2012;**13**:414–30.
- 568 26. Deng Y, Jiang Y-H, Yang Y *et al.* Molecular ecological network analyses. *BMC Bioinformatics*  
569 2012;**13**:113.
- 570 27. Dill-Macky R, Jones RK. The effect of previous crop residues and tillage on *Fusarium* head  
571 blight of wheat. *Plant Disease* 2000;**84**:71–6.
- 572 28. Edel-Hermann V, Gautheron N, Mounier A *et al.* *Fusarium* diversity in soil using a specific  
573 molecular approach and a cultural approach. *Journal of Microbiological Methods* 2015;**111**:64–  
574 71.
- 575 29. Edgar RC. Search and clustering orders of magnitude faster than BLAST. *Bioinformatics*  
576 2010;**26**:2460–1.
- 577 30. Edgar RC, Haas BJ, Clemente JC *et al.* UCHIME improves sensitivity and speed of chimera  
578 detection. *Bioinformatics* 2011;**27**:2194–200.

- 579 31. Edwards SG, Jennings P. Impact of agronomic factors on *Fusarium* mycotoxins in harvested  
580 wheat. *Food Additives & Contaminants: Part A* 2018;**35**:2443–54.
- 581 32. Fernandez M, Huber D, Basnyat P *et al.* Impact of agronomic practices on populations of  
582 *Fusarium* and other fungi in cereal and noncereal crop residues on the Canadian Prairies. *Soil*  
583 *and Tillage Research* 2008;**100**:60–71.
- 584 33. Fruchterman TMJ, Reingold EM. 1991. Graph drawing by force-directed placement. *Software*  
585 *– Practice and Experience* 1991;**21**(11):1129–1164.
- 586 34. García-Salamanca A, Molina-Henares MA, van Dillewijn P *et al.* Bacterial diversity in the  
587 rhizosphere of maize and the surrounding carbonate-rich bulk soil: Biodiversity in adjacent  
588 niches. *Microbial Biotechnology* 2013;**6**:36–44.
- 589 35. Haack FS, Poehlein A, Kröger C *et al.* Molecular keys to the *Janthinobacterium* and *Duganella*  
590 spp. interaction with the plant pathogen *Fusarium graminearum*. *Frontiers in Microbiology*  
591 2016;**7**:1668.
- 592 36. Haas BJ, Gevers D, Earl AM *et al.* Chimeric 16S rRNA sequence formation and detection in  
593 Sanger and 454-pyrosequenced PCR amplicons. *Genome Research* 2011;**21**:494–504.
- 594 37. He J, Boland GJ, Zhou T. Concurrent selection for microbial suppression of *Fusarium*  
595 *graminearum*, *Fusarium* head blight and deoxynivalenol in wheat. *Journal of Applied*  
596 *Microbiology* 2009;**106**:1805–17.

- 597 38. He S, Guo L, Niu M *et al.* Ecological diversity and co-occurrence patterns of bacterial  
598 community through soil profile in response to long-term switchgrass cultivation. *Scientific*  
599 *Reports* 2017;**7**(1):3608.
- 600 39. Hellin P, Dedeurwaerder G, Duvivier M *et al.* Relationship between *Fusarium* spp. diversity  
601 and mycotoxin contents of mature grains in southern Belgium. *Food Additives &*  
602 *Contaminants: Part A* 2016;**33**:1228–40.
- 603 40. Herlemann DP, Labrenz M, Jürgens K *et al.* Transitions in bacterial communities along the  
604 2000 km salinity gradient of the Baltic Sea. *The ISME Journal* 2011;**5**:1571–9.
- 605 41. Ho Y-N, Chiang H-M, Chao C-P *et al.* In planta biocontrol of soilborne *Fusarium* wilt of  
606 banana through a plant endophytic bacterium, *Burkholderia cenocepacia* 869T2. *Plant and Soil*  
607 2015;**387**:295–306.
- 608 42. Huo Y, Kang J-P, Park J-K *et al.* *Rhodanobacter ginsengiterrae* sp. nov., an antagonistic  
609 bacterium against root rot fungal pathogen *Fusarium solani*, isolated from ginseng rhizospheric  
610 soil. *Archives of Microbiology* 2018;**200**:1457–63.
- 611 43. Ito M, Sato I, Ishizaka M *et al.* Bacterial cytochrome P450 system catabolizing the *Fusarium*  
612 toxin deoxynivalenol. *Applied and Environmental Microbiology* 2013;**79**:1619–28.
- 613 44. Jensen BD, Knorr K, Nicolaisen M. In vitro competition between *Fusarium graminearum* and  
614 *Epicoccum nigrum* on media and wheat grains. *European Journal of Plant Pathology*  
615 2016;**146**:657–70.
- 616 45.

- 617 46. Karimi B, Meyer C, Gilbert D *et al.* Air pollution below WHO levels decreases by 40% the  
618 links of terrestrial microbial networks. *Environmental Chemistry Letters* 2016;**14**(4):467–475.
- 619 47. Karlsson I, Edel-Hermann V, Gautheron N *et al.* Genus-specific primers for study of *Fusarium*  
620 communities in field samples. *Applied and Environmental Microbiology* 2016;**82**:491–501.
- 621 48. Karlsson I, Friberg H, Kolseth A-K *et al.* Agricultural factors affecting *Fusarium* communities  
622 in wheat kernels. *International Journal of Food Microbiology* 2017;**252**:53–60.
- 623 49. Köhl J, Lombaers C, Moretti A *et al.* Analysis of microbial taxonomical groups present in  
624 maize stalks suppressive to colonization by toxigenic *Fusarium* spp.: A strategy for the  
625 identification of potential antagonists. *Biological Control* 2015;**83**:20–8.
- 626 50. Kõljalg U, Nilsson RH, Abarenkov K *et al.* Towards a unified paradigm for sequence-based  
627 identification of fungi. *Molecular Ecology* 2013;**22**:5271–7.
- 628 51. LeBlanc N, Kinkel LL, Kistler HC. Soil fungal communities respond to grassland plant  
629 community richness and soil edaphics. *Microbial Ecology* 2015;**70**:188–95.
- 630 52. Legrand F, Picot A, Cobo-Díaz JF *et al.* Challenges facing the biological control strategies for  
631 the management of *Fusarium* head blight of cereals caused by *F. graminearum*. *Biological*  
632 *Control* 2017;**113**:26–38.
- 633 53. Legrand F, Chen W, Cobo-Díaz JF *et al.* Co-occurrence analysis reveal that biotic and abiotic  
634 factors influence soil fungistasis against *Fusarium graminearum*. *FEMS Microbiology Ecology*  
635 2019;**95**:fiz056.

- 636 54. Legrand F, Picot A, Cobo-Díaz JF *et al.* Effect of tillage and static abiotic soil properties on  
637 microbial diversity. *Applied Soil Ecology* 2018;**132**:135–45.
- 638 55. Leplat J, Friberg H, Abid M *et al.* Survival of *Fusarium graminearum*, the causal agent of  
639 *Fusarium* head blight. A review. *Agronomy for Sustainable Development* 2013;**33**:97–111.
- 640 56. Leplat J, Heraud C, Gautheron E *et al.* Colonization dynamic of various crop residues by  
641 *Fusarium graminearum* monitored through real-time PCR measurements. *Journal of Applied*  
642 *Microbiology* 2016;**121**:1394–405.
- 643 57. Li X, Rui J, Mao Y *et al.* Dynamics of the bacterial community structure in the rhizosphere of a  
644 maize cultivar. *Soil Biology and Biochemistry* 2014;**68**:392–401.
- 645 58. Li J, Yang H, Zhou F *et al.* Effects of maize residue return rate on nitrogen transformations and  
646 gaseous losses in an arable soil. *Agricultural Water Management* 2019;**211**:132–141.
- 647 59. Liu X-Z, Wang Q-M, Göker M *et al.* Towards an integrated phylogenetic classification of the  
648 Tremellomycetes. *Studies in Mycology* 2015;**81**:85–147.
- 649 60. Louca S, Parfrey LW, Doebeli M. Decoupling function and taxonomy in the global ocean  
650 microbiome. *Science* 2016;**353**:1272–7.
- 651 61. Luongo L, Galli M, Corazza L *et al.* Potential of fungal antagonists for biocontrol of *Fusarium*  
652 spp. in wheat and maize through competition in crop debris. *Biocontrol Science and Technology*  
653 2005;**15**:229–42.



- 654 62. Lupatini M, Suleiman AKA, Jacques RJS *et al.* Network topology reveals high connectance  
655 levels and few key microbial genera within soils. *Frontiers in Environmental Science*  
656 2014;**2**:10.
- 657 63. Lutz MC, Lopes CA, Rodriguez ME *et al.* Efficacy and putative mode of action of native and  
658 commercial antagonistic yeasts against postharvest pathogens of pear. *International Journal of*  
659 *Food Microbiology* 2013;**164**:166–72.
- 660 64. Maiorano A, Blandino M, Reyneri A *et al.* Effects of maize residues on the *Fusarium* spp.  
661 infection and deoxynivalenol (DON) contamination of wheat grain. *Crop Protection*  
662 2008;**27**:182–8.
- 663 65. Maresma A, Martínez-Casasnovas JA, Santiveri F *et al.* Nitrogen management in double-annual  
664 cropping system (barley-maize) under irrigated Mediterranean environments. *European Journal*  
665 *of Agronomy* 2019;**103**:98–107.
- 666 66. McDonald D, Price MN, Goodrich J *et al.* An improved Greengenes taxonomy with explicit  
667 ranks for ecological and evolutionary analyses of bacteria and archaea. *The ISME Journal*  
668 2012;**6**:610–8.
- 669 67. Mousa WK, Shearer CR, Limay-Rios V *et al.* Bacterial endophytes from wild maize suppress  
670 *Fusarium graminearum* in modern maize and inhibit mycotoxin accumulation. *Frontiers in*  
671 *Plant Science* 2015;**6**:805.
- 672 68. Nguyen NH, Song Z, Bates ST *et al.* FUNGuild: An open annotation tool for parsing fungal  
673 community datasets by ecological guild. *Fungal Ecology* 2016;**20**:241–8.

- 674 69. Nicolaisen M, Justesen AF, Knorr K *et al.* Fungal communities in wheat grain show significant  
675 co-existence patterns among species. *Fungal Ecology* 2014;**11**:145–53.
- 676 70. Nielsen LK, Jensen JD, Nielsen GC *et al.* *Fusarium* head blight of cereals in Denmark: species  
677 complex and related mycotoxins. *Phytopathology* 2011;**101**:960–9.
- 678 71. Oksanen J, Blanchet FG, Friendly M *et al.* vegan: community ecology package. R package,  
679 2019. <https://cran.r-project.org/web/packages/vegan/index.html>
- 680 72. R Core Team. 2017. R: A language and environment for statistical computing. R Foundation for  
681 Statistical Computing, Vienna, Austria. <http://www.R-project.org/>.
- 682 73. Sauvadet M, Chauvat M, Cluzeau D *et al.* The dynamics of soil micro-food web structure and  
683 functions vary according to litter quality. *Soil Biology and Biochemistry* 2016;**95**:262–74.
- 684 74. Scauflaire J, Mahieu O, Louvieux J *et al.* Biodiversity of *Fusarium* species in ears and stalks  
685 of maize plants in Belgium. *European Journal of Plant Pathology* 2011;**131**:59–66.
- 686 75. Schaafsma AW, Tamburic-Ilicic L, Hooker DC. Effect of previous crop, tillage, field size,  
687 adjacent crop, and sampling direction on airborne propagules of *Gibberella zae/Fusarium*  
688 *graminearum*, *Fusarium* head blight severity, and deoxynivalenol accumulation in winter  
689 wheat. *Canadian Journal of Plant Pathology* 2005;**27**:217–24.
- 690 76. Schisler DA, Slininger PJ, Boehm MJ *et al.* Co-culture of yeast antagonists of *Fusarium* head  
691 blight and their effect on disease development in wheat. *Plant Pathology Journal* 2011;**10**:128–  
692 37.

- 693 77. Schöneberg T, Martin C, Wettstein FE *et al.* *Fusarium* and mycotoxin spectra in Swiss barley  
694 are affected by various cropping techniques. *Food Additives & Contaminants: Part A*  
695 2016;**33**:1608–19.
- 696 78. Shen Z, Wang D, Ruan Y *et al.* Deep 16S rRNA pyrosequencing reveals a bacterial community  
697 associated with banana *Fusarium* wilt disease suppression induced by bio-organic fertilizer  
698 application. Berg G (ed.). *PLoS ONE* 2014;**9**:e98420.
- 699 79. Silvestro LB, Stenglein SA, Forjan H *et al.* Occurrence and distribution of soil *Fusarium*  
700 species under wheat crop in zero tillage. *Spanish Journal of Agricultural Research* 2013;**11**:72.
- 701 80. Singh DP, Backhouse D, Kristiansen P. Interactions of temperature and water potential in  
702 displacement of *Fusarium pseudograminearum* from cereal residues by fungal antagonists.  
703 *Biological Control* 2009;**48**:188–95.
- 704 81. Smith M-C, Madec S, Coton E *et al.* Natural co-occurrence of mycotoxins in foods and feeds  
705 and their in vitro combined toxicological effects. *Toxins* 2016;**8**:94.
- 706 82. Sugahara H, Kondo T, Okada M *et al.* *Articulospora* sp. produces Art1, an inhibitor of bacterial  
707 histidine kinase. *Bioscience, Biotechnology, and Biochemistry* 2008;**72**:2521–5.
- 708 83. Toju H, Peay KG, Yamamichi M *et al.* Core microbiomes for sustainable agroecosystems  
709 *Nature Plants* 2018;**4**:247–57.
- 710 84. Tralamazza SM, Bemvenuti RH, Zorzete P *et al.* Fungal diversity and natural occurrence of  
711 deoxynivalenol and zearalenone in freshly harvested wheat grains from Brazil. *Food Chemistry*  
712 2016;**196**:445–50.

- 713 85. UNITE Community. UNITE USEARCH/UTAX release. 2017, DOI: 10.15156/BIO/587476.
- 714 86. Vacher C, Tamaddoni-Nezhad A, Kamenova S *et al.* Learning ecological networks from next-  
715 generation sequencing data. *Advances in Ecological Research* 2016;**54**:1–39.
- 716 87. Vogelgsang S, Hecker A, Musa T *et al.* On-farm experiments over 5 years in a grain  
717 maize/winter wheat rotation: effect of maize residue treatments on *Fusarium graminearum*  
718 infection and deoxynivalenol contamination in wheat. *Mycotoxin Research* 2011;**27**:81–96.
- 719 88. Wachowska U, Irzykowski W, Jędrzycka M *et al.* Biological control of winter wheat pathogens  
720 with the use of antagonistic *Sphingomonas* bacteria under greenhouse conditions. *Biocontrol*  
721 *Science and Technology* 2013;**23**:1110–22.
- 722 89. Wachowska U, Kucharska K, Jędrzycka M *et al.* Microorganisms as biological control agents  
723 against *Fusarium* pathogens in winter wheat. *Pol J Environ Stud* 2013;**22**:591–7.
- 724 90. Wang L-Y, Xie Y-S, Cui Y-Y *et al.* Conjunctively screening of biocontrol agents (BCAs)  
725 against *Fusarium* root rot and *Fusarium* head blight caused by *Fusarium graminearum*.  
726 *Microbiological Research* 2015;**177**:34–42.
- 727 91. White TJ, Bruns T, Lee S *et al.* Amplification and direct sequencing of fungal ribosomal RNA  
728 genes for phylogenetics. *PCR Protocols* 1990, 315–22.
- 729 92. Xu X-M, Parry DW, Nicholson P *et al.* Predominance and association of pathogenic fungi  
730 causing *Fusarium* ear blight in wheat in four European countries. *European Journal of Plant*  
731 *Pathology* 2005;**112**:143–54.

- 732 93. Xu L, Ravnskov S, Larsen J *et al.* Soil fungal community structure along a soil health gradient  
733 in pea fields examined using deep amplicon sequencing. *Soil Biology and Biochemistry*  
734 2012;**46**:26–32.
- 735 94. Yang Y, Wang N, Guo X *et al.* Comparative analysis of bacterial community structure in the  
736 rhizosphere of maize by high-throughput pyrosequencing. *PLOS ONE* 2017a;**12**:e0178425.
- 737 95. Yang H, Li J, Xiao Y *et al.* An integrated insight into the relationship between soil microbial  
738 community and tobacco bacterial wilt disease. *Frontiers in Microbiology* 2017b;**8**, DOI:  
739 10.3389/fmicb.2017.02179.
- 740 96. Yin C, Hulbert SH, Schroeder KL *et al.* Role of bacterial communities in the natural  
741 suppression of *Rhizoctonia solani* bare patch disease of wheat (*Triticum aestivum* L.). *Applied*  
742 *and Environmental Microbiology* 2013;**79**:7428–38.
- 743 97. Zappellini C, Karimi B, Foulon J *et al.* Diversity and complexity of microbial communities from  
744 a chlor-alkali tailings dump. *Soil Biology and Biochemistry* 2015;**90**:101–110.
- 745 98. Zakrzewski M, Proietti C, Ellis JJ *et al.* Calypso: a user-friendly web-server for mining and  
746 visualizing microbiome–environment interactions. *Bioinformatics* 2016:btw725.
- 747 99. Zhao M, Sun B, Wu L *et al.* Zonal soil type determines soil microbial responses to maize  
748 cropping and fertilization. Chu H (ed.). *mSystems* 2016;**1**:e00075-16.
- 749 100. Zhao M, Yuan J, Zhang R *et al.* Microflora that harbor the NRPS gene are responsible  
750 for *Fusarium* wilt disease-suppressive soil. *Applied Soil Ecology* 2018;**12**:83–90.

- 751 101. Zhao M, Sun B, Wu L *et al.* Dissimilar responses of fungal and bacterial communities to  
752 soil transplantation simulating abrupt climate changes. *Molecular Ecology* 2019;**28**:1842– 56.
- 753 102. Zhou G, Zhang J, Zhang C *et al.* Effects of changes in straw chemical properties and  
754 alkaline soils on bacterial communities engaged in straw decomposition at different  
755 temperatures. *Scientific Reports* 2016;**6**:22186.
- 756

757 **Table 1.** Characteristics of sampled fields.

758 **Table 2.** Topological properties of field bacteria networks.

759 **Table 3.** Nodes in field networks with significant co-occurrence with *Fusarium* spp. nodes

760 **Table 4.** Topological properties of mesocosm bacteria networks.

761 **Table 5.** Analysis of the proportion of intra-kingdom interactions in the co-occurrence networks.

762

763 **Figure 1. Field *Fusarium* communities.** a) Richness index, b) evenness index, c) PCoA plot and d)  
764 Rank test analysis.

765 **Figure 2. Field bacterial communities.** a) Richness index, b) evenness index, c) PCoA plot and d)  
766 Rank test analysis.

767 **Figure 3. Field bacterial functionality.** a) PCoA and b) Rank test analysis using the functional groups  
768 obtained by FAPROTAX pipeline.

769 **Figure 4. Field fungal communities.** a) Richness index, b) evenness index, c) PCoA plot, d) Rank test  
770 analysis, and e) core microbiome analysis.

771 **Figure 5. Co-occurrence networks.** Degree-Eigenvalue Centrality plot for nodes in a) field bacteria  
772 networks, b) mesocosm bacteria networks, c) field bacteria-fungi networks and d) bacteria-fungi  
773 networks. Vertical line indicate Eigenvalue centrality equal to 0.24.

774 **Figure 6. Mesocosm betadiversity analysis.** PCoA plot of a) bacterial and b) fungal communities  
775 obtained in mesocosm experiment at d15.

776

777

778 **Table S1. Nodes topological characteristics and taxonomic assignment.** Only nodes with highest  
779 eigenvalue centrality ( $> 0.24$ ) were indicated. “Network” column indicates to which networks belong  
780 (year number for field soil networks, “Maize” for maize network, treatment for mesocosm networks).

781 **Figure S1. Sampled fields in November 2016.** Photos of sampled fields a) P08, b) P09, c) P20 and d)  
782 P23. Maize residues from P23 were used for silage and not left in crop.

783 **Figure S2. Bacteria co-occurrence sub-network.** Nodes with highest topological characteristics  
784 (plotted in yellow) and those correlated to them were plotted. Nodes were colored by phylum and edges  
785 according to positive (green) or negative (red) correlation between nodes linked.

786 **Figure S3. Mesocosm bacterial communities.** a) Richness index, b) evenness index, c) Rank test  
787 analysis for *Fusarium* treatments, d) Rank test analysis for Control treatments and e) Rank test analysis  
788 compared *Fusarium* treatments versus control treatments.

789 **Figure S4. Mesocosm bacterial functionality.** a) Rank test analysis for control treatments, b) soil  
790 treatments and c) maize treatments, using the functional groups obtained by FAPROTAX pipeline.

791 **Figure S5. Field fungal communities.** a) Richness index, b) evenness index, c) Rank test analysis for  
792 *Fusarium* treatments, d) Rank test analysis for Control treatments.



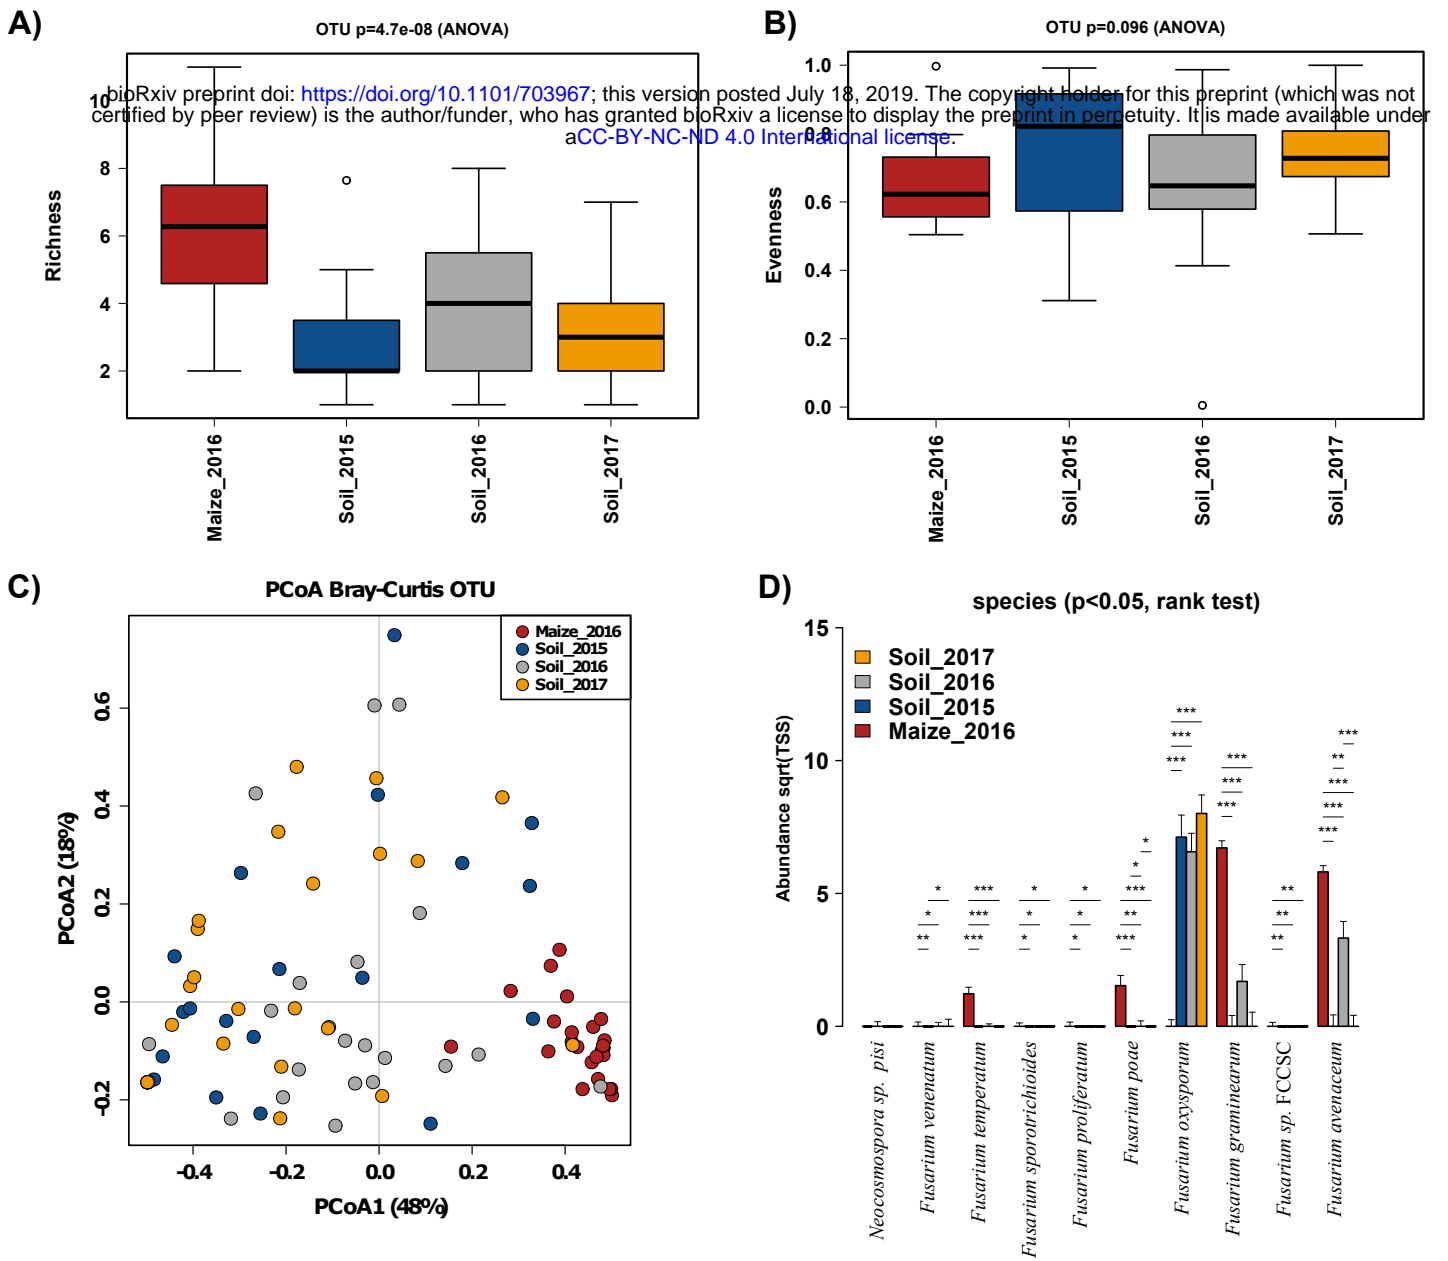

**Figure 1. Field *Fusarium* communities.** a) Richness index, b) evenness index, c) PCoA plot and d) Rank test analysis.

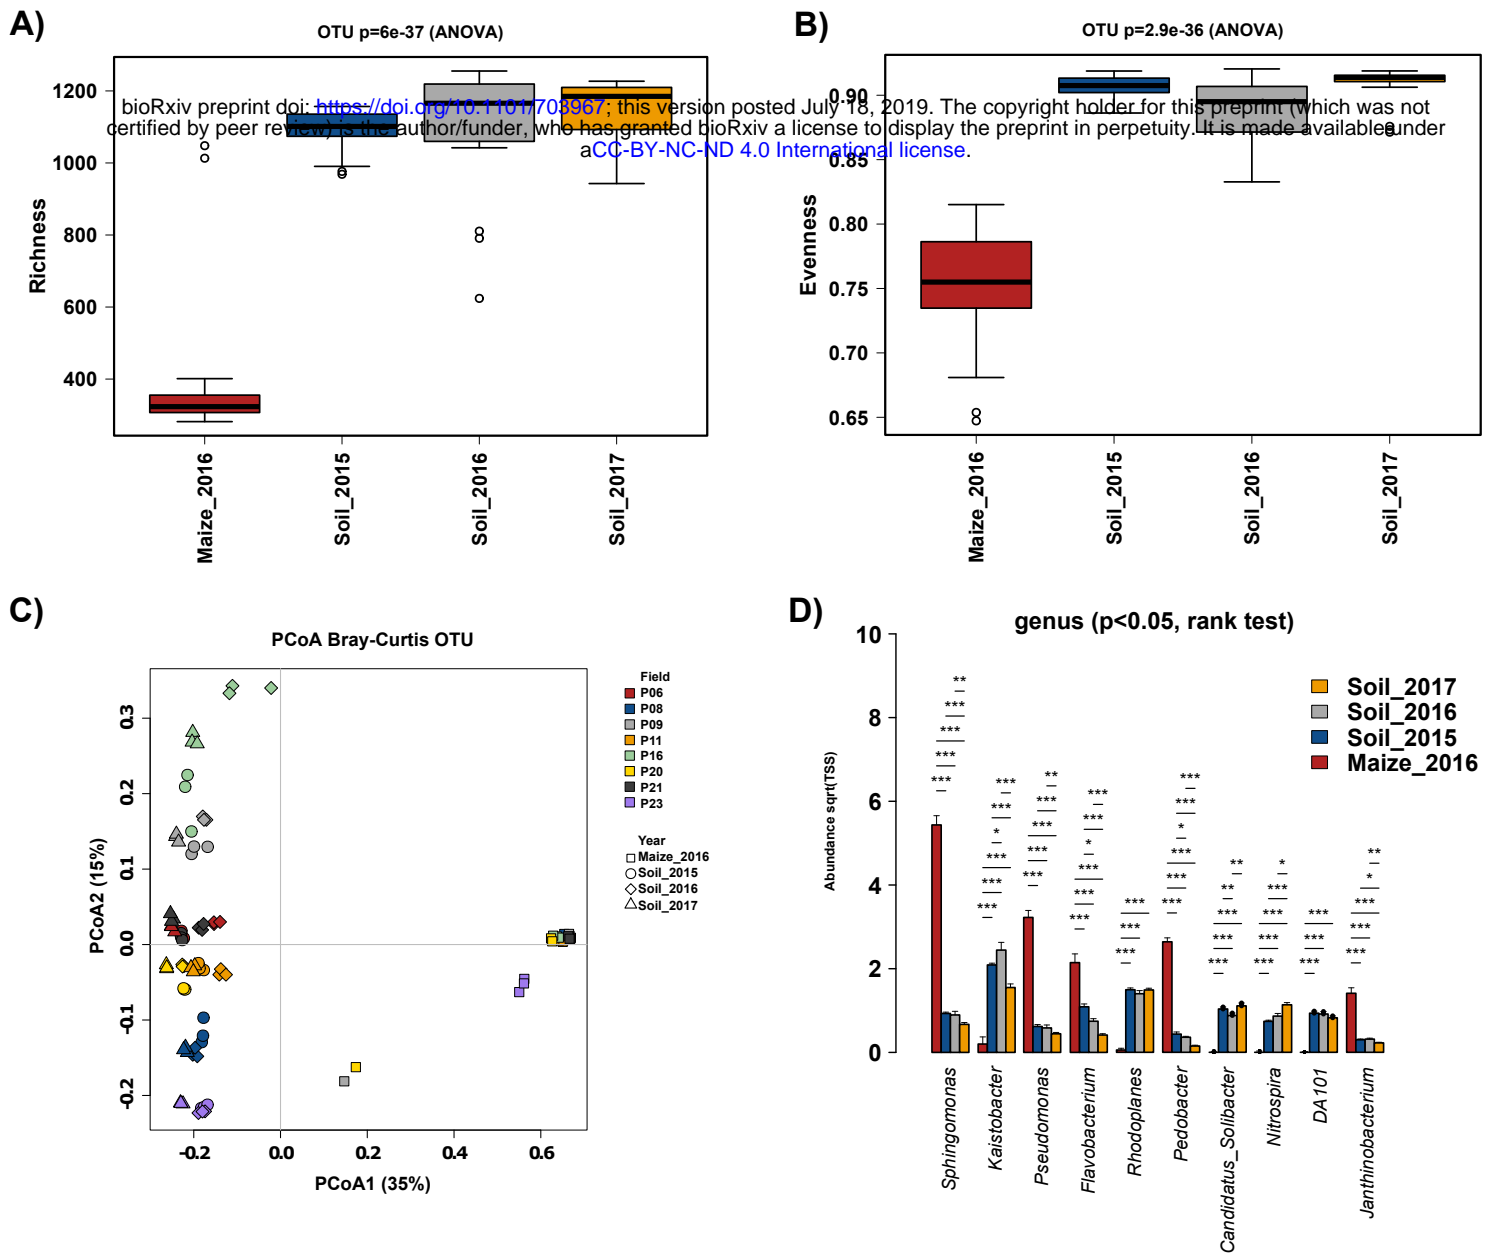

**Figure 2. Field bacterial communities.** a) Richness index, b) evenness index, c) PCoA plot and d) Rank test analysis.

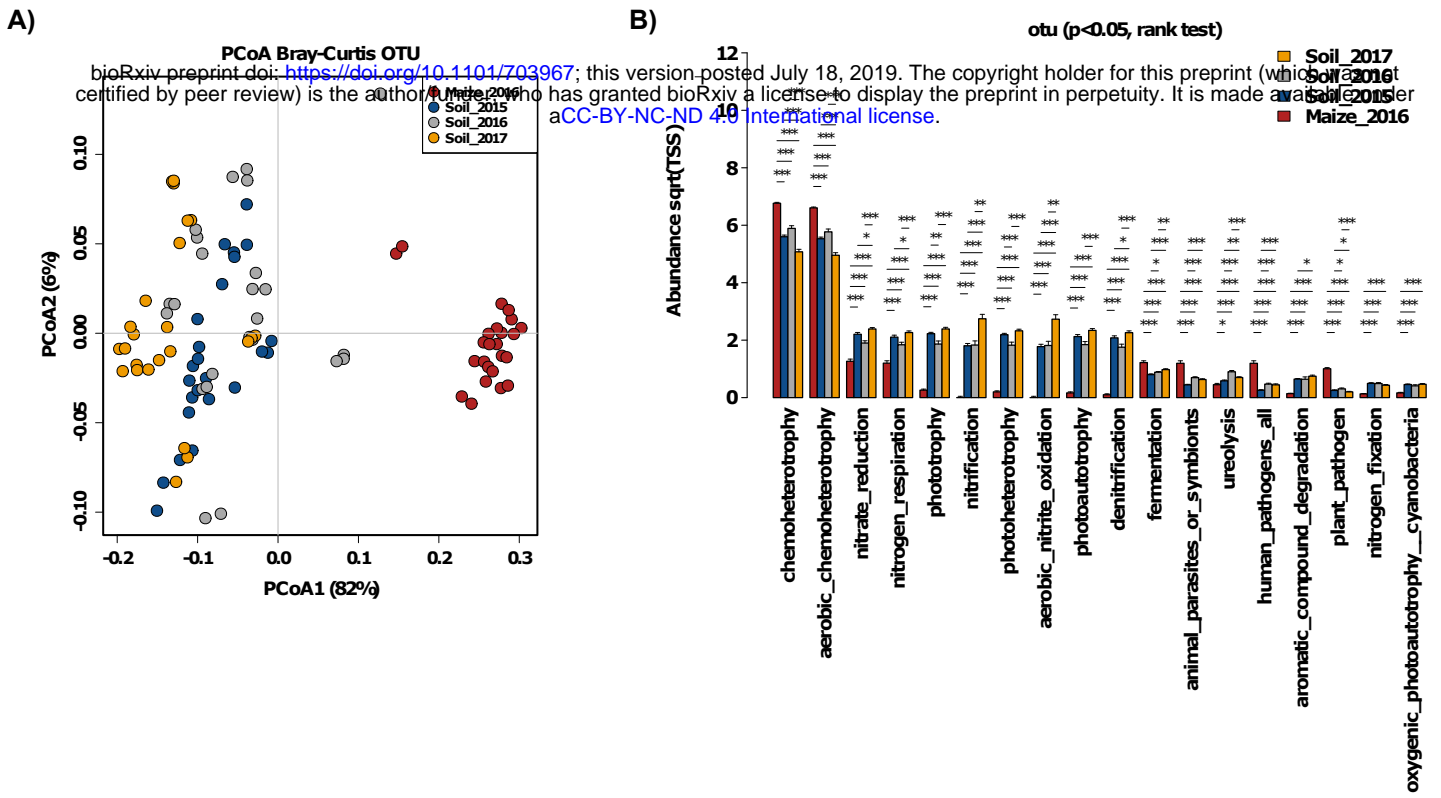

**Figure 3. Field bacterial functionality.** a) PCoA and b) Rank test analysis using the functional groups obtained by FAPROTAX pipeline.

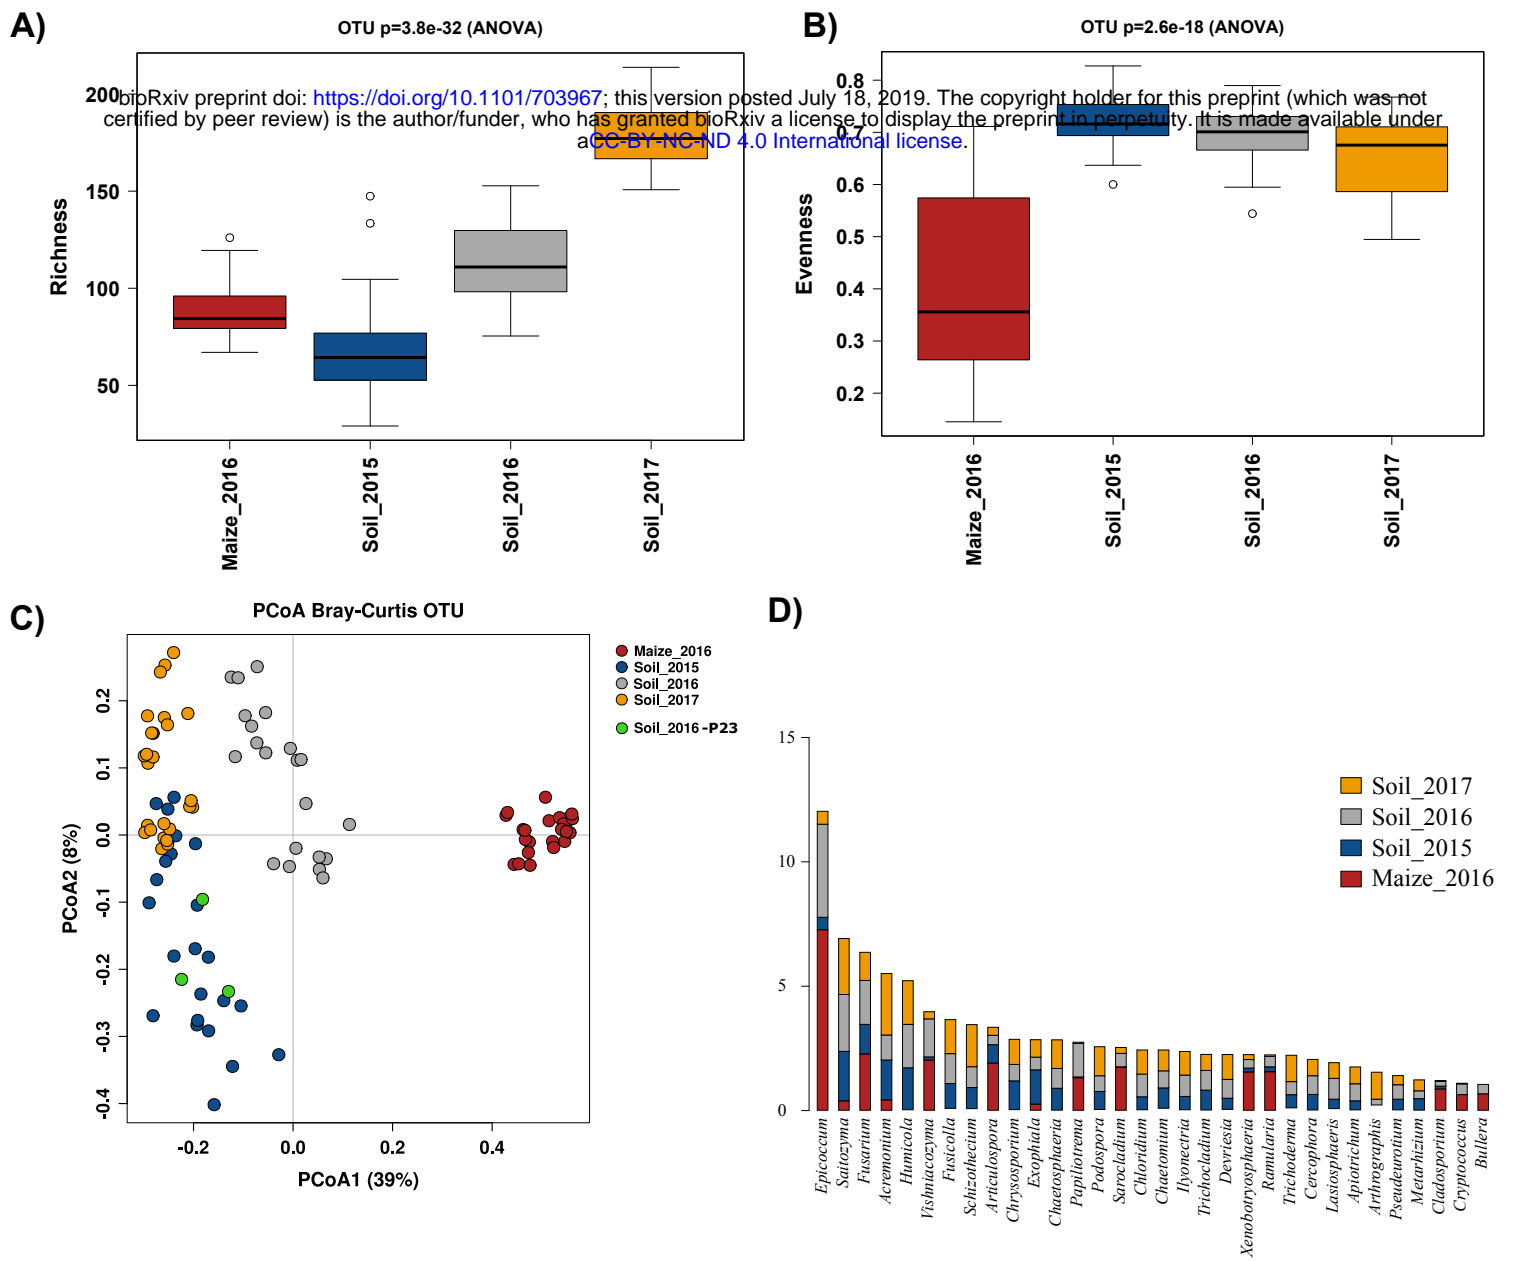

**Figure 4. Field fungal communities.** a) Richness index, b) evenness index, c) PCoA plot, d) Rank test analysis, and e) core microbiome analysis.

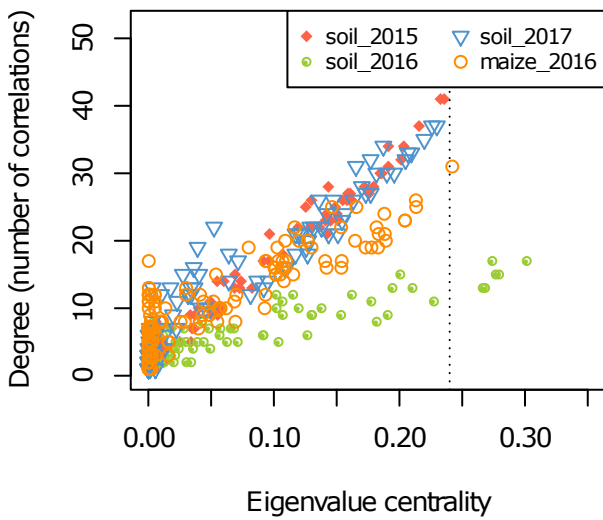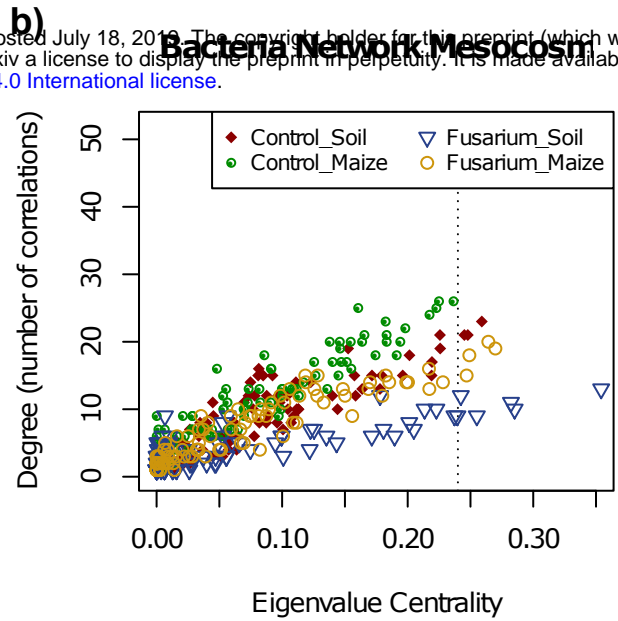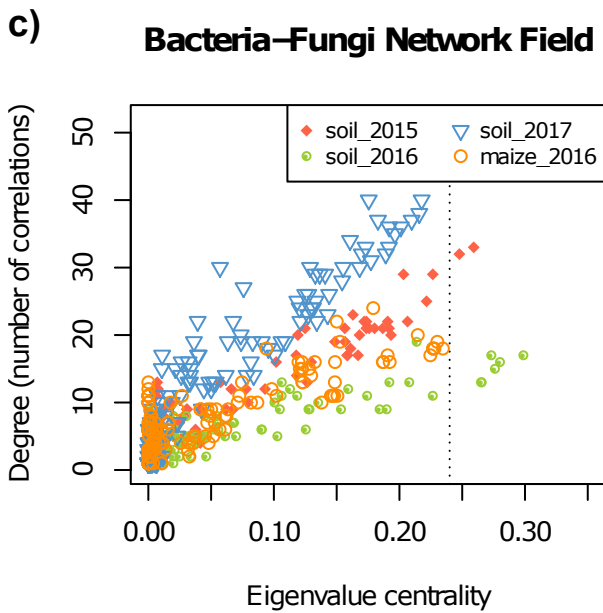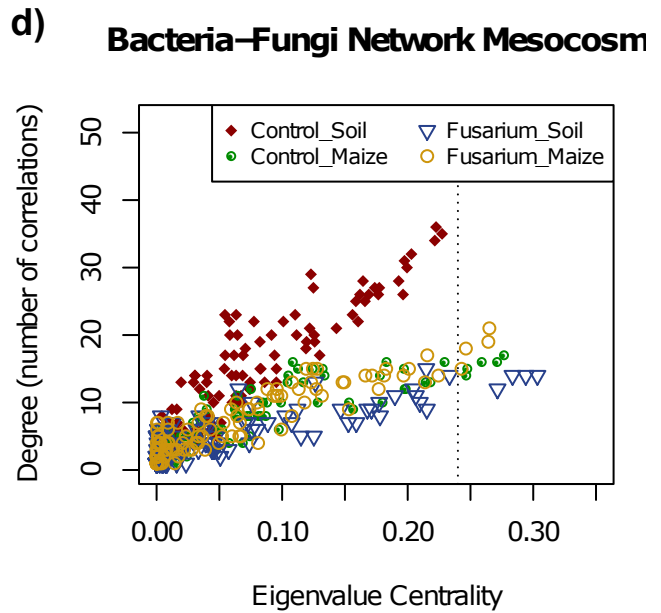

**Figure 5. Co-occurrence networks.** Degree-Eigenvalue Centrality plot for nodes in a) field bacteria networks, b) mesocosm bacteria networks, c) field bacteria -fungi networks and d) bacteria -fungi networks. Vertical line indicate Eigenvalue centrality equal to 0.24.

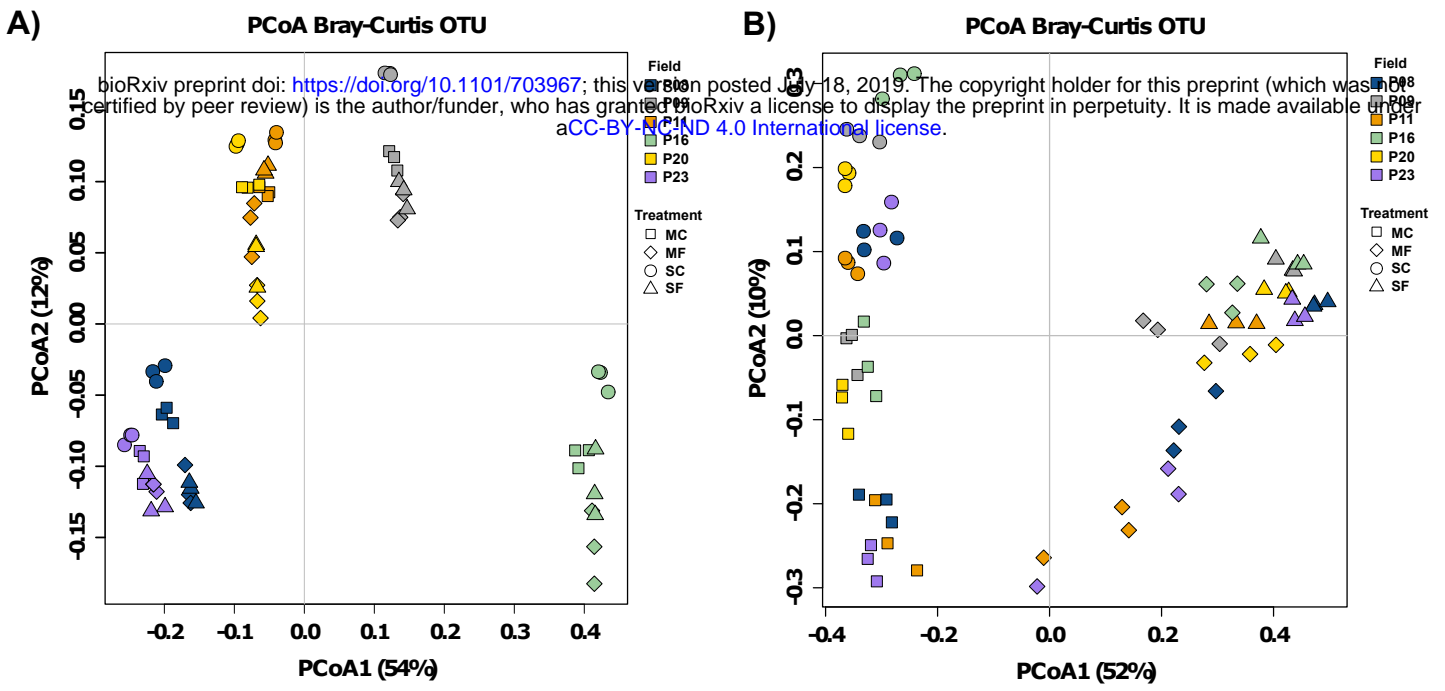

**Figure 6. Mesocosm betadiversity analysis.** PCoA plot of a) bacterial and b) fungal communities obtained in mesocosm experiment at d15.

Table 1

| Code | Location (City)    | GPS Coordenates      | April 2015 | November 2016 | April 2017 | Tillage      | Fertilizers       |
|------|--------------------|----------------------|------------|---------------|------------|--------------|-------------------|
| P06  | Gouesnou           | 48.447893, -4.435354 | Wheat      | Maize         | Wheat      | Conventional | Chemical + Manure |
| P08  | Plouvenez Lochrist | 48.598551, -4.240471 | Wheat      | Maize         | Wheat      | Conventional | Chemical + Manure |
| P09  | Porspoder          | 48.451933, -4.628142 | Wheat      | Maize         | Wheat      | Conventional | Chemical + Manure |
| P11  | Loudéac            | 48.218545, -2.806619 | Wheat      | Maize         | Wheat      | Minimum      | Chemical + Manure |
| P16  | Bannalec           | 47.932287, -3.712028 | Wheat      | Maize         | Nothing    | Conventional | Unknown           |
| P20  | Plabennec          | 48.500746, -4.440550 | Wheat      | Maize         | Wheat      | Conventional | Chemical + Manure |
| P21  | Kergoz Bannalec    | 47.958804, -3.705690 | Wheat      | Maize         | Wheat      | Conventional | Chemical          |
| P23  | Plouider           | 48.606743, -4.281656 | Wheat      | Maize *       | Onion      | Conventional | Chemical + Manure |

\* Maize used for silage

Table 2

**Network Indexes**

|                                               | <b>2015 (0.690)</b> | <b>2016 (0.820)</b> | <b>2017 (0.760)</b> | <b>maize (0.710)</b> |
|-----------------------------------------------|---------------------|---------------------|---------------------|----------------------|
| Total nodes                                   | 110                 | 127                 | 108                 | 145                  |
| Total links                                   | 661                 | 304                 | 698                 | 763                  |
| R square of power-law                         | 0.496               | 0.909               | 0.39                | 0.305                |
| Average degree (avgK)                         | 12.018              | 4.787               | 12.926              | 10.524               |
| Average clustering coefficient (avgCC)        | 0.449               | 0.346               | 0.473               | 0.598                |
| Average path distance (GD)                    | 2.699               | 3.747               | 3.044               | 3.935                |
| Geodesic efficiency (E)                       | 0.465               | 0.34                | 0.421               | 0.333                |
| Harmonic geodesic distance (HD)               | 2.149               | 2.939               | 2.373               | 3.006                |
| Maximal degree                                | 41                  | 17                  | 37                  | 31                   |
| Centralization of degree (CD)                 | 0.271               | 0.098               | 0.229               | 0.144                |
| Maximal betweenness                           | 453.174             | 1312.223            | 1300.332            | 1717.985             |
| Centralization of betweenness (CB)            | 0.066               | 0.156               | 0.213               | 0.147                |
| Maximal stress centrality                     | 3426                | 4244                | 12784               | 39741                |
| Centralization of stress centrality (CS)      | 0.48                | 0.487               | 2.038               | 3.5                  |
| Maximal eigenvector centrality                | 0.236               | 0.301               | 0.23                | 0.242                |
| Centralization of eigenvector centrality (CE) | 0.174               | 0.257               | 0.168               | 0.193                |
| Density (D)                                   | 0.11                | 0.038               | 0.121               | 0.073                |
| Transitivity (Trans)                          | 0.568               | 0.416               | 0.604               | 0.569                |
| Connectedness (Con)                           | 0.748               | 0.56                | 0.963               | 1                    |
| Efficiency                                    | 0.863               | 0.945               | 0.883               | 0.933                |



Table 3

| Network                      | Node name                               | Phylum *               | Taxonomy              | Fusarium node                           | Fusarium species **             |
|------------------------------|-----------------------------------------|------------------------|-----------------------|-----------------------------------------|---------------------------------|
| <b>Negative correlations</b> |                                         |                        |                       |                                         |                                 |
| 2016                         | b_4360511                               | c__Gammaproteobacteria | f__Enterobacteriaceae | f_SH020374.07FU_GQ505688                | s__Gibberella_intricans (FIESC) |
| 2016                         | b_1566691                               | c__Gammaproteobacteria | g__Pseudomonas        | f_SH020374.07FU_GQ505688                | s__Gibberella_intricans (FIESC) |
| 2017                         | b_1108199                               | p__Acidobacteria       | f__Koribacteraceae    | f_SH031935.07FU_AB586992_refs           | s__Gibberella_zeae              |
| 2017                         | b_1108199                               | p__Acidobacteria       | f__Koribacteraceae    | f_SH022239.07FU_KU901536_reps           | s__Gibberella_tricineta         |
| 2017                         | f_New.ReferenceOTU154                   | p__Ascomycota          | g__Chaetosphaeria     | f_SH031935.07FU_AB586992_refs           | s__Gibberella_zeae              |
| 2017                         | f_New.ReferenceOTU154                   | p__Ascomycota          | g__Chaetosphaeria     | f_SH495279.07FU_KT268914_reps_singleton | s__Gibberella_tricineta         |
| Maize                        | b_New.ReferenceOTU191                   | p__Bacteroidetes       | g__Hymenobacter       | f_New.ReferenceOTU284                   | s__Fusarium_venenatum           |
| Maize                        | f_SH019454.07FU_KP859013_refs           | p__Ascomycota          | g__Microdochium       | f_New.ReferenceOTU284                   | s__Fusarium_venenatum           |
| Maize                        | f_New.ReferenceOTU246                   | p__Ascomycota          | g__Epicoccum          | f_SH026899.07FU_AB587010_refs           | s__Gibberella_fujikuroi         |
| Maize                        | b_New.ReferenceOTU445                   | c__Gammaproteobacteria | f__Enterobacteriaceae | f_SH026899.07FU_AB587010_refs           | s__Gibberella_fujikuroi         |
| <b>Positive correlations</b> |                                         |                        |                       |                                         |                                 |
| Maize                        | b_264229                                | p__Bacteroidetes       | g__Flavobacterium     | f_SH022239.07FU_KU901536_reps           | s__Gibberella_tricineta         |
| Maize                        | b_264229                                | p__Bacteroidetes       | g__Flavobacterium     | f_SH495279.07FU_KT268914_reps_singleton | s__Gibberella_tricineta         |
| Maize                        | f_SH004916.07FU_HQ875391_refs           | p__Basidiomycota       | g__Vishniacozyma      | f_SH489173.07FU_KR909450_reps           | s__Gibberella_tricineta         |
| Maize                        | f_SH004916.07FU_HQ875391_refs           | p__Basidiomycota       | g__Vishniacozyma      | f_SH495279.07FU_KT268914_reps_singleton | s__Gibberella_tricineta         |
| Maize                        | f_SH479820.07FU_KJ160145_reps_singleton | p__Ascomycota          | c__Sordariomycetes    | f_SH026899.07FU_AB587010_refs           | s__Gibberella_fujikuroi         |
| Maize                        | b_509372                                | p__Bacteroidetes       | g__Flavobacterium     | f_SH026899.07FU_AB587010_refs           | s__Gibberella_fujikuroi         |
| Maize                        | f_SH024466.07FU_HG965034_refs           | p__Ascomycota          | g__Sarocladium        | f_SH026899.07FU_AB587010_refs           | s__Gibberella_fujikuroi         |

\* Class for Proteobacteria

\*\* Taxonomical assignment by UNITE database

Table 4

**Network Indexes**

|                                               | <b>CM (0.860)</b> | <b>CS (0.880)</b> | <b>FM (0.860)</b> | <b>FS (0.900)</b> |
|-----------------------------------------------|-------------------|-------------------|-------------------|-------------------|
| Total nodes                                   | 131               | 111               | 112               | 93                |
| Total links                                   | 557               | 410               | 351               | 196               |
| R square of power-law                         | 0.642             | 0.598             | 0.695             | 0.758             |
| Average degree (avgK)                         | 8.504             | 7.387             | 6.268             | 4.215             |
| Average clustering coefficient (avgCC)        | 0.447             | 0.458             | 0.425             | 0.346             |
| Average path distance (GD)                    | 3.664             | 3.147             | 3.596             | 4.234             |
| Geodesic efficiency (E)                       | 0.364             | 0.394             | 0.363             | 0.304             |
| Harmonic geodesic distance (HD)               | 2.748             | 2.539             | 2.758             | 3.286             |
| Maximal degree                                | 26                | 23                | 20                | 13                |
| Centralization of degree (CD)                 | 0.137             | 0.145             | 0.126             | 0.098             |
| Maximal betweenness                           | 1396.241          | 716.186           | 743.481           | 1320.59           |
| Centralization of betweenness (CB)            | 0.152             | 0.106             | 0.106             | 0.289             |
| Maximal stress centrality                     | 20169             | 8982              | 3948              | 4020              |
| Centralization of stress centrality (CS)      | 2.201             | 1.344             | 0.546             | 0.878             |
| Maximal eigenvector centrality                | 0.237             | 0.259             | 0.27              | 0.354             |
| Centralization of eigenvector centrality (CE) | 0.181             | 0.194             | 0.211             | 0.298             |
| Density (D)                                   | 0.065             | 0.067             | 0.056             | 0.046             |
| Transitivity (Trans)                          | 0.527             | 0.442             | 0.439             | 0.409             |
| Connectedness (Con)                           | 0.759             | 0.752             | 0.721             | 0.836             |
| Efficiency                                    | 0.923             | 0.921             | 0.932             | 0.957             |

Table 5

| Sample | Number of nodes |      | Number of interactions |    |     | Theoretical Max. interactions |                 |                 | % of interactions <sup>4</sup> |      |      |
|--------|-----------------|------|------------------------|----|-----|-------------------------------|-----------------|-----------------|--------------------------------|------|------|
|        | bact            | fung | bb                     | ff | fb  | bb <sup>1</sup>               | ff <sup>2</sup> | fb <sup>3</sup> | bb                             | ff   | fb   |
| 2015   | 95              | 112  | 440                    | 3  | 74  | 4465                          | 6216            | 10640           | 9.85                           | 0.05 | 0.70 |
| 2016   | 132             | 160  | 304                    | 4  | 50  | 8646                          | 12720           | 21120           | 3.52                           | 0.03 | 0.24 |
| 2017   | 112             | 181  | 698                    | 58 | 269 | 6216                          | 16290           | 20272           | 11.23                          | 0.36 | 1.33 |
| Maize  | 138             | 166  | 500                    | 27 | 68  | 9453                          | 13695           | 22908           | 5.29                           | 0.20 | 0.30 |
| FM     | 114             | 22   | 351                    | 10 | 48  | 6441                          | 231             | 2508            | 5.45                           | 4.33 | 1.91 |
| FS     | 112             | 9    | 267                    | 0  | 20  | 6216                          | 36              | 1008            | 4.30                           | 0.00 | 1.98 |
| CS     | 130             | 44   | 680                    | 17 | 137 | 8385                          | 946             | 5720            | 8.11                           | 1.80 | 2.40 |
| CM     | 113             | 40   | 317                    | 23 | 49  | 6328                          | 780             | 4520            | 5.01                           | 2.95 | 1.08 |

<sup>1</sup> estimated by  $x = n! / (2x(n-1)!)$ , where  $n$  is the number of bacteria nodes

<sup>2</sup> estimated by  $x = n! / (2x(n-1)!)$ , where  $n$  is the number of fungi nodes

<sup>3</sup> estimated by  $x = n_f \times n_b$ , where  $n_f$  and  $n_b$  are the number of fungi and bacteria nodes, respectively

<sup>4</sup> percentage of interactions found from the theoretical maximum interactions
